# Supplementary material for: Exposure to Trypanosoma parasites induces changes in the microbiome of the Chagas disease vector Rhodnius prolixus
Source: Microbiome. 2022 Mar 10;10:45. doi: 10.1186/s40168-022-01240-z (PMC8908696; doi:10.1186/s40168-022-01240-z)
Supplement: Supplementary file 2 — Additional file 1. Genome assemblies obtained from NCBI and used for the pangenomic analysis including information on the bacterial strains and GenBank accession numbers. [file 40168_2022_1240_MOESM1_ESM.xlsx]

## Sheet: Tabelle1
Organism	Strain	Accession no.
Enterococcus faecalis	CLB21560	GCF_001989555.1
Enterococcus faecalis	H25	GCF_002289045.2
Enterococcus faecalis	SF28073	GCF_014489455.1
Enterococcus faecalis	T90-1	GCF_016743895.1
Enterococcus faecalis	TY1	GCF_003345275.1
Enterococcus faecalis	VE14089	GCF_006494835.1
Enterococcus faecalis	VE18379	GCF_006494855.1
Enterococcus faecalis	VE18395	GCF_006494875.1
Erwinia tracheiphila	PSU-1	GCF_000404125.1
Klebsiella pneumoniae	FDAARGOS 775	GCF_006364295.1
Kocuria indica	DSM 25126	GCF_002237805.1
Kocuria indica	NIO-1021	GCF_003667205.1
Kocuria indica	CE7	GCF_004328535.1
Kocuria marina	KCTC 9943	GCF_014652975.1
Kocuria marina	TRE150902	GCF_900169805.1
Kocuria rhizophila	4R-31	GCF_004563945.1
Kocuria rhizophila	28R2A-20	GCF_017723815.1
Kocuria turfanensis	HO-9042	GCF_001580365.1
Kocuria turfanensis	NBRC 107627	GCF_007992155.1
Pectobacterium atrosepticum	21A	GCF_000740965.1
Pectobacterium atrosepticum	JG10-08	GCF_000696465.1
Pectobacterium versatile	14A	GCF_003932035.1
Pectobacterium versatile	F131	GCF_002921235.2
Pectobacterium brasiliense	1692	GCF_009873295.1
Pectobacterium brasiliense	F126	GCF_003990515.2
Pectobacterium brasiliense	IPO:4057 NAK:249	GCF_016944555.1
Pectobacterium brasiliense	SX309	GCF_002068115.1
Pectobacterium carotovorum	2A	GCF_016415585.1
Pectobacterium carotovorum	WPP14	GCF_013488025.1
Pectobacterium carotovorum	XP-13	GCF_016864995.1
Pectobacterium wasabiae	CFBP 3304	GCF_001742185.1
Rhodococcus corynebacterioides	DSM 20151	GCF_001646675.1
Rhodococcus corynebacterioides	NBRC 14404	GCF_001894765.1
Rhodococcus rhodnii	LMG 5362	GCF_000389715.1
Rhodococcus rhodnii	NBRC 100604	GCF_001894925.1
Rhodococcus rhodnii	ATCC 35071	GCF_008011915.1
Rhodococcus triatomae	DSM 44893	GCF_014217765.1
Rhodococcus triatomae	DSM 44892	GCF_014217785.1
Serratia marcescens	UCI87	GCF_001034395.1
