# Supplementary material for: Exposure to Trypanosoma parasites induces changes in the microbiome of the Chagas disease vector Rhodnius prolixus
Source: Microbiome. 2022 Mar 10;10:45. doi: 10.1186/s40168-022-01240-z (PMC8908696; doi:10.1186/s40168-022-01240-z)
Supplement: Supplementary file 3 — Additional file 2. Genomes obtained from NCBI and used for phylogenomic tree construction of Sp_FE21 including information on GenBank accession numbers. [file 40168_2022_1240_MOESM2_ESM.xlsx]

## Sheet: Tabelle1
Organism	Strain	Accession no.
Brenneria alni	NCPPB 3934	GCF_003666245.1
Brenneria goodwinii	FRB141	GCF_002291445.1
Brenneria nigrifluens	ATCC 13028	GCF_005484965.1
Brenneria roseae	LMG 27715	GCF_003115815.1
Brenneria rubrifaciens	6D370	GCF_005484945.1
Brenneria salicis	ATCC 15712	GCF_012932875.1
Dickeya aquatica	174/2	GCF_900095885.1
Dickeya chrysanthemi	Ech1591	GCF_000023565.1
Dickeya dadantii	3937	GCF_000147055.1
Dickeya dianthicola	ME23	GCF_003403135.1
Dickeya lacustris	S29	GCF_003934295.1
Dickeya oryzae	ZYY5	GCF_009372235.1
Dickeya paradisiaca	Ech703	GCF_000023545.1
Dickeya poaceiphila	NCPPB 569	GCF_007858975.2
Dickeya solani	IPO 2222	GCF_001644705.1
Dickeya undicola	2B12	GCF_000784735.1
Dickeya zeae	MS2	GCF_002887555.1
Escherichia coli	K-12 substr. MG1655	GCF_000005845.2
Pectobacterium aquaticum	A212-S19-A16	GCF_003382565.2
Pectobacterium atrosepticum	21A	GCF_000740965.1
Pectobacterium brasiliense	1692	GCF_009873295.1
Pectobacterium carotovorum	WPP14	GCF_013488025.1
Pectobacterium odoriferum	JK2.1	GCF_009931295.1
Pectobacterium parvum	NCPPB 3395	GCF_000749915.1
Pectobacterium peruviense	UGC32	GCF_001039065.1
Pectobacterium polaris	NIBIO1392	GCF_002288545.1
Pectobacterium punjabense	SS95	GCF_012427845.1
Pectobacterium versatile	SCC1	GCF_003571485.1
Pectobacterium wasabiae	CFBP 3304	GCF_001742185.1
