# Supplementary material for: Exposure to Trypanosoma parasites induces changes in the microbiome of the Chagas disease vector Rhodnius prolixus
Source: Microbiome. 2022 Mar 10;10:45. doi: 10.1186/s40168-022-01240-z (PMC8908696; doi:10.1186/s40168-022-01240-z)
Supplement: Supplementary file 4 — Additional file 3. NCBI SRA identifiers for the raw sequencing data of each sample (BioProject PRJNA744378). The sample names consist of details on the timepoint after exposure (T0-T7), the pathogen used (control, T. cruzi, T. rangeli) and the intestinal segment (anterior midgut, posterior midgut). [file 40168_2022_1240_MOESM3_ESM.xlsx]

## Sheet: Tabelle1
Sample	SRA identifier
T0ContAM	SRR15276521
T0ContPM	SRR15276520
T0cruzAM	SRR15276539
T0cruzPM	SRR15276528
T0rangAM	SRR15276527
T0rangPM	SRR15276526
T1ContAM	SRR15276524
T1ContPM	SRR15276525
T1cruzAM	SRR15276523
T1cruzPM	SRR15276522
T1rangAM	SRR15276519
T1rangPM	SRR15276518
T2ContAM	SRR15276547
T2ContPM	SRR15276546
T2cruzAM	SRR15276545
T2cruzPM	SRR15276544
T2rangAM	SRR15276543
T2rangPM	SRR15276542
T3ContAM	SRR15276541
T3ContPM	SRR15276540
T3cruzAM	SRR15276538
T3cruzPM	SRR15276537
T3rangAM	SRR15276535
T3rangPM	SRR15276536
T7ContAM	SRR15276534
T7ContPM	SRR15276533
T7cruzAM	SRR15276532
T7cruzPM	SRR15276531
T7rangAM	SRR15276529
T7rangPM	SRR15276530
