# Supplementary material for: Exposure to Trypanosoma parasites induces changes in the microbiome of the Chagas disease vector Rhodnius prolixus
Source: Microbiome. 2022 Mar 10;10:45. doi: 10.1186/s40168-022-01240-z (PMC8908696; doi:10.1186/s40168-022-01240-z)
Supplement: Supplementary file 5 — Additional file 4. Number of metagenomic read pairs per sample after trimming and the removal of insect reads with bowtie2 (v.2.2.5). [file 40168_2022_1240_MOESM4_ESM.xlsx]

## Sheet: Tabelle1
Sample	Read pairs
T0ContAM	33,646,270
T0ContPM	13,090,157
T0cruzAM	19,873,656
T0cruzPM	9,480,589
T0rangAM	35,944,607
T0rangPM	8,972,913
T1ContAM	19,703,011
T1ContPM	9,708,030
T1cruzAM	18,533,343
T1cruzPM	9,682,563
T1rangAM	43,336,643
T1rangPM	7,805,069
T2ContAM	15,228,137
T2ContPM	6,295,311
T2cruzAM	15,853,043
T2cruzPM	10,099,789
T2rangAM	25,553,029
T2rangPM	6,363,933
T3ContAM	9,441,783
T3ContPM	6,282,406
T3cruzAM	11,806,226
T3cruzPM	9,129,929
T3rangAM	21,353,574
T3rangPM	8,836,052
T7ContAM	19,173,178
T7ContPM	8,274,636
T7cruzAM	13,819,342
T7cruzPM	7,406,390
T7rangAM	12,268,632
T7rangPM	6,998,869
Mean	14,798,703
