# Supplementary material for: Exposure to Trypanosoma parasites induces changes in the microbiome of the Chagas disease vector Rhodnius prolixus
Source: Microbiome. 2022 Mar 10;10:45. doi: 10.1186/s40168-022-01240-z (PMC8908696; doi:10.1186/s40168-022-01240-z)
Supplement: Supplementary file 6 — Additional file 5. Percentage of reads assigned to a taxonomic group by Kaiju (Menzel et al., 2016) and the proportionate amount of bacterial reads. [file 40168_2022_1240_MOESM5_ESM.xlsx]

## Sheet: Tabelle1
Sample	Assigned reads	Bacterial reads [%]
T0ContAM	29.98	36.15
T0ContPM	40.27	84.49
T0cruzAM	31.27	40.23
T0cruzPM	18.06	61.49
T0rangAM	30.98	35.95
T0rangPM	16.66	60.86
T1ContAM	31.22	56.04
T1ContPM	31.22	56.04
T1cruzAM	33.43	57.11
T1cruzPM	32.93	90.75
T1rangAM	29.98	40.36
T1rangPM	16.66	60.86
T2ContAM	31.22	56.04
T2ContPM	17.01	84.06
T2cruzAM	36.41	67.33
T2cruzPM	26.28	91.77
T2rangAM	33.59	50.88
T2rangPM	25.8	91.63
T3ContAM	16.75	85.97
T3ContPM	16.75	85.97
T3cruzAM	29.8	93.52
T3cruzPM	32.6	94.13
T3rangAM	35.39	78.35
T3rangPM	49.98	96.8
T7ContAM	26.6	89.87
T7ContPM	22.98	90.48
T7cruzAM	59.95	97.51
T7cruzPM	29.8	93.52
T7rangAM	43.02	94.45
T7rangPM	30.03	93.47
Mean	30.51	73.87
SD	9.82	20.74
