# Supplementary material for: Exposure to Trypanosoma parasites induces changes in the microbiome of the Chagas disease vector Rhodnius prolixus
Source: Microbiome. 2022 Mar 10;10:45. doi: 10.1186/s40168-022-01240-z (PMC8908696; doi:10.1186/s40168-022-01240-z)
Supplement: Supplementary file 8 — Additional file 7. Shannon and Pielou indices for each sample describing alpha diversity and species evenness, respectively. [file 40168_2022_1240_MOESM7_ESM.xlsx]

## Sheet: Tabelle1
Sample	Shannon index	Pielou index
T0ContAM	2.861	0.925
T0ContPM	1.708	0.687
T0cruzAM	2.743	0.887
T0cruzPM	2.589	0.850
T0rangAM	2.818	0.925
T0rangPM	2.652	0.871
T1ContAM	2.234	0.846
T1ContPM	2.234	0.846
T1cruzAM	2.163	0.819
T1cruzPM	1.715	0.668
T1rangAM	2.391	0.812
T1rangPM	2.652	0.871
T2ContAM	2.234	0.846
T2ContPM	2.282	0.775
T2cruzAM	1.901	0.765
T2cruzPM	1.965	0.725
T2rangAM	2.288	0.867
T2rangPM	1.855	0.723
T3ContAM	1.980	0.714
T3ContPM	1.980	0.714
T3cruzAM	1.267	0.550
T3cruzPM	1.507	0.654
T3rangAM	1.886	0.759
T3rangPM	1.338	0.747
T7ContAM	1.831	0.693
T7ContPM	1.588	0.619
T7cruzAM	1.001	0.622
T7cruzPM	1.267	0.550
T7rangAM	1.056	0.589
T7rangPM	1.692	0.659
