# Supplementary material for: Exposure to Trypanosoma parasites induces changes in the microbiome of the Chagas disease vector Rhodnius prolixus
Source: Microbiome. 2022 Mar 10;10:45. doi: 10.1186/s40168-022-01240-z (PMC8908696; doi:10.1186/s40168-022-01240-z)
Supplement: Supplementary file 9 — Additional file 8. Functional modules and genes present in the reconstructed MAGs based on KEGG metabolic pathways. Module definitions, the corresponding hits in the MAGs (kofam_hits_in_module) and module completeness are given. [file 40168_2022_1240_MOESM8_ESM.xlsx]

## Sheet: Biosy. terpenoids & polyketides
unique_id	bin_name	kegg_module	module_name	module_class	module_category	module_subcategory	module_definition	module_completeness	module_is_complete	kofam_hits_in_module
468523	Bin_Enterococcus_faecalis	M00365	C10-C20 isoprenoid biosynthesis. archaea	Pathway modules	Biosynthesis of terpenoids and polyketides	Terpenoid backbone biosynthesis	K01823 K13787	0.5	False	K01823
468522	Bin_Enterococcus_faecalis	M00364	C10-C20 isoprenoid biosynthesis. bacteria	Pathway modules	Biosynthesis of terpenoids and polyketides	Terpenoid backbone biosynthesis	K01823 (K00795.K13789.K13787)	0.5	False	K01823
468525	Bin_Enterococcus_faecalis	M00367	C10-C20 isoprenoid biosynthesis. non-plant eukaryotes	Pathway modules	Biosynthesis of terpenoids and polyketides	Terpenoid backbone biosynthesis	K01823 K00787 K00804	0.333333	False	K01823
468524	Bin_Enterococcus_faecalis	M00366	C10-C20 isoprenoid biosynthesis. plants	Pathway modules	Biosynthesis of terpenoids and polyketides	Terpenoid backbone biosynthesis	K01823 K14066 K00787 K13789	0.25	False	K01823
468519	Bin_Enterococcus_faecalis	M00095	C5 isoprenoid biosynthesis. mevalonate pathway	Pathway modules	Biosynthesis of terpenoids and polyketides	Terpenoid backbone biosynthesis	K00626 K01641 K00021 K00869 (K00938.K13273) K01597 K01823	0.857143	True	K00626.K01641.K01823.K00938.K00869.K01597
468520	Bin_Enterococcus_faecalis	M00849	C5 isoprenoid biosynthesis. mevalonate pathway. archaea	Pathway modules	Biosynthesis of terpenoids and polyketides	Terpenoid backbone biosynthesis	K00626 K01641 (K00021.K00054) ((K00869 K17942).(K18689 K18690 K22813)) K06981 K01823	0.714286	False	K00054.K00626.K01641.K01823.K00869
468521	Bin_Enterococcus_faecalis	M00096	C5 isoprenoid biosynthesis. non-mevalonate pathway	Pathway modules	Biosynthesis of terpenoids and polyketides	Terpenoid backbone biosynthesis	K01662 K00099 (K00991.K12506) K00919 (K01770.K12506) K03526 K03527 K01823	0.375	False	K01770.K01823.K00919
468526	Bin_Enterococcus_faecalis	M00793	dTDP-L-rhamnose biosynthesis	Pathway modules	Biosynthesis of terpenoids and polyketides	Polyketide sugar unit biosynthesis	K00973 K01710 (K01790 K00067.K23987)	1	True	K01710.K00973.K01790.K00067
573117	Bin_Kocuria	M00097	beta-Carotene biosynthesis. GGAP => beta-carotene	Pathway modules	Biosynthesis of terpenoids and polyketides	Plant terpenoid biosynthesis	K02291 K02293 K15744 K00514 K09835 K06443	0.166667	False	K02291
573114	Bin_Kocuria	M00365	C10-C20 isoprenoid biosynthesis. archaea	Pathway modules	Biosynthesis of terpenoids and polyketides	Terpenoid backbone biosynthesis	K01823 K13787	1	True	K01823.K13787
573113	Bin_Kocuria	M00364	C10-C20 isoprenoid biosynthesis. bacteria	Pathway modules	Biosynthesis of terpenoids and polyketides	Terpenoid backbone biosynthesis	K01823 (K00795.K13789.K13787)	1	True	K01823.K13787
573116	Bin_Kocuria	M00367	C10-C20 isoprenoid biosynthesis. non-plant eukaryotes	Pathway modules	Biosynthesis of terpenoids and polyketides	Terpenoid backbone biosynthesis	K01823 K00787 K00804	0.333333	False	K01823
573115	Bin_Kocuria	M00366	C10-C20 isoprenoid biosynthesis. plants	Pathway modules	Biosynthesis of terpenoids and polyketides	Terpenoid backbone biosynthesis	K01823 K14066 K00787 K13789	0.25	False	K01823
573110	Bin_Kocuria	M00095	C5 isoprenoid biosynthesis. mevalonate pathway	Pathway modules	Biosynthesis of terpenoids and polyketides	Terpenoid backbone biosynthesis	K00626 K01641 K00021 K00869 (K00938.K13273) K01597 K01823	0.285714	False	K00626.K01823
573111	Bin_Kocuria	M00849	C5 isoprenoid biosynthesis. mevalonate pathway. archaea	Pathway modules	Biosynthesis of terpenoids and polyketides	Terpenoid backbone biosynthesis	K00626 K01641 (K00021.K00054) ((K00869 K17942).(K18689 K18690 K22813)) K06981 K01823	0.285714	False	K00626.K01823
573112	Bin_Kocuria	M00096	C5 isoprenoid biosynthesis. non-mevalonate pathway	Pathway modules	Biosynthesis of terpenoids and polyketides	Terpenoid backbone biosynthesis	K01662 K00099 (K00991.K12506) K00919 (K01770.K12506) K03526 K03527 K01823	0.625	False	K01823.K03527.K03526.K00099.K00919
573118	Bin_Kocuria	M00778	Type II polyketide backbone biosynthesis. acyl-CoA + malonyl-CoA => polyketide	Pathway modules	Biosynthesis of terpenoids and polyketides	Type II polyketide biosynthesis	K05551+K05552+K05553 -K12420 ((K05554.K14249.K15884.K15885) (K05555.K14250).K15886)	0.333333	False	K05555
816592	Bin_Pectobacterium	M00365	C10-C20 isoprenoid biosynthesis. archaea	Pathway modules	Biosynthesis of terpenoids and polyketides	Terpenoid backbone biosynthesis	K01823 K13787	0.5	False	K01823
816591	Bin_Pectobacterium	M00364	C10-C20 isoprenoid biosynthesis. bacteria	Pathway modules	Biosynthesis of terpenoids and polyketides	Terpenoid backbone biosynthesis	K01823 (K00795.K13789.K13787)	1	True	K01823.K00795
816594	Bin_Pectobacterium	M00367	C10-C20 isoprenoid biosynthesis. non-plant eukaryotes	Pathway modules	Biosynthesis of terpenoids and polyketides	Terpenoid backbone biosynthesis	K01823 K00787 K00804	0.333333	False	K01823
816593	Bin_Pectobacterium	M00366	C10-C20 isoprenoid biosynthesis. plants	Pathway modules	Biosynthesis of terpenoids and polyketides	Terpenoid backbone biosynthesis	K01823 K14066 K00787 K13789	0.25	False	K01823
816588	Bin_Pectobacterium	M00095	C5 isoprenoid biosynthesis. mevalonate pathway	Pathway modules	Biosynthesis of terpenoids and polyketides	Terpenoid backbone biosynthesis	K00626 K01641 K00021 K00869 (K00938.K13273) K01597 K01823	0.285714	False	K01823.K00626
816589	Bin_Pectobacterium	M00849	C5 isoprenoid biosynthesis. mevalonate pathway. archaea	Pathway modules	Biosynthesis of terpenoids and polyketides	Terpenoid backbone biosynthesis	K00626 K01641 (K00021.K00054) ((K00869 K17942).(K18689 K18690 K22813)) K06981 K01823	0.285714	False	K01823.K00626
816590	Bin_Pectobacterium	M00096	C5 isoprenoid biosynthesis. non-mevalonate pathway	Pathway modules	Biosynthesis of terpenoids and polyketides	Terpenoid backbone biosynthesis	K01662 K00099 (K00991.K12506) K00919 (K01770.K12506) K03526 K03527 K01823	1	True	K01823.K03527.K01770.K00991.K03526.K00099.K00919.K01662
816595	Bin_Pectobacterium	M00793	dTDP-L-rhamnose biosynthesis	Pathway modules	Biosynthesis of terpenoids and polyketides	Polyketide sugar unit biosynthesis	K00973 K01710 (K01790 K00067.K23987)	0.333333	False	K01710
688101	Bin_Rhodococcus_rhodnii	M00097	beta-Carotene biosynthesis. GGAP => beta-carotene	Pathway modules	Biosynthesis of terpenoids and polyketides	Plant terpenoid biosynthesis	K02291 K02293 K15744 K00514 K09835 K06443	0.333333	False	K02291.K06443
688102	Bin_Rhodococcus_rhodnii	M00827	C-1027 beta-amino acid moiety biosynthesis. tyrosine => 3-chloro-4.5-dihydroxy-beta-phenylalanyl-PCP	Pathway modules	Biosynthesis of terpenoids and polyketides	Enediyne biosynthesis	K21183 K21181 K21182 K16431 K21184 K21185	0.166667	False	K16431
688098	Bin_Rhodococcus_rhodnii	M00365	C10-C20 isoprenoid biosynthesis. archaea	Pathway modules	Biosynthesis of terpenoids and polyketides	Terpenoid backbone biosynthesis	K01823 K13787	1	True	K13787.K01823
688097	Bin_Rhodococcus_rhodnii	M00364	C10-C20 isoprenoid biosynthesis. bacteria	Pathway modules	Biosynthesis of terpenoids and polyketides	Terpenoid backbone biosynthesis	K01823 (K00795.K13789.K13787)	1	True	K13787.K01823
688100	Bin_Rhodococcus_rhodnii	M00367	C10-C20 isoprenoid biosynthesis. non-plant eukaryotes	Pathway modules	Biosynthesis of terpenoids and polyketides	Terpenoid backbone biosynthesis	K01823 K00787 K00804	0.333333	False	K01823
688099	Bin_Rhodococcus_rhodnii	M00366	C10-C20 isoprenoid biosynthesis. plants	Pathway modules	Biosynthesis of terpenoids and polyketides	Terpenoid backbone biosynthesis	K01823 K14066 K00787 K13789	0.25	False	K01823
688094	Bin_Rhodococcus_rhodnii	M00095	C5 isoprenoid biosynthesis. mevalonate pathway	Pathway modules	Biosynthesis of terpenoids and polyketides	Terpenoid backbone biosynthesis	K00626 K01641 K00021 K00869 (K00938.K13273) K01597 K01823	0.285714	False	K00626.K01823
688095	Bin_Rhodococcus_rhodnii	M00849	C5 isoprenoid biosynthesis. mevalonate pathway. archaea	Pathway modules	Biosynthesis of terpenoids and polyketides	Terpenoid backbone biosynthesis	K00626 K01641 (K00021.K00054) ((K00869 K17942).(K18689 K18690 K22813)) K06981 K01823	0.285714	False	K00626.K01823
688096	Bin_Rhodococcus_rhodnii	M00096	C5 isoprenoid biosynthesis. non-mevalonate pathway	Pathway modules	Biosynthesis of terpenoids and polyketides	Terpenoid backbone biosynthesis	K01662 K00099 (K00991.K12506) K00919 (K01770.K12506) K03526 K03527 K01823	0.875	True	K01662.K03526.K00099.K01823.K03527.K00991.K00919
688104	Bin_Rhodococcus_rhodnii	M00793	dTDP-L-rhamnose biosynthesis	Pathway modules	Biosynthesis of terpenoids and polyketides	Polyketide sugar unit biosynthesis	K00973 K01710 (K01790 K00067.K23987)	1	True	K00067.K01710.K00973.K01790
688103	Bin_Rhodococcus_rhodnii	M00832	Kedarcidin 2-aza-3-chloro-beta-tyrosine moiety biosynthesis. azatyrosine => 2-aza-3-chloro-beta-tyrosyl-PCP	Pathway modules	Biosynthesis of terpenoids and polyketides	Enediyne biosynthesis	K21183 K21227 K21228 K16431 K21185	0.2	False	K16431

## Sheet: Biosyn. secondary metabolites
unique_id	bin_name	kegg_module	module_name	module_class	module_category	module_subcategory	module_definition	module_completeness	module_is_complete	kofam_hits_in_module
468527	Bin_Enterococcus_faecalis	M00039	Monolignol biosynthesis. phenylalanine/tyrosine => monolignol	Pathway modules	Biosynthesis of other secondary metabolites	Biosynthesis of phytochemical compounds	(K10775.K13064) K00487 K01904 K13065 K09754 K00588 K09753 K09755 K13066 (K00083.K22395)	0.1	False	K00588
468528	Bin_Enterococcus_faecalis	M00835	Pyocyanine biosynthesis. chorismate => pyocyanine	Pathway modules	Biosynthesis of other secondary metabolites	Biosynthesis of other bacterial compounds	K13063 K20261 K06998 K20260 K20262 K21103 K20940	0.142857	False	K06998
573120	Bin_Kocuria	M00835	Pyocyanine biosynthesis. chorismate => pyocyanine	Pathway modules	Biosynthesis of other secondary metabolites	Biosynthesis of other bacterial compounds	K13063 K20261 K06998 K20260 K20262 K21103 K20940	0.142857	False	K06998
573119	Bin_Kocuria	M00848	Aurachin biosynthesis. anthranilate => aurachin A	Pathway modules	Biosynthesis of other secondary metabolites	Biosynthesis of other antibiotics	K09460 K02078+K14245+K14246+K22798 K22799 K22800 K21272 K21271 K22801 K22802	0.03125	False	K02078
573122	Bin_Kocuria	M00918	Aerobactin biosynthesis. lysine => aerobactin	Pathway modules	Biosynthesis of other secondary metabolites	Biosynthesis of other bacterial compounds	K03897 K03896 K03894 K03895	0.25	False	K03897
573121	Bin_Kocuria	M00921	Cyclooctatin biosynthesis. dimethylallyl-PP + isopentenyl-PP => cyclooctatin	Pathway modules	Biosynthesis of other secondary metabolites	Biosynthesis of other bacterial compounds	K13787 K18686 K22997 K22998	0.25	False	K13787
816596	Bin_Pectobacterium	M00848	Aurachin biosynthesis. anthranilate => aurachin A	Pathway modules	Biosynthesis of other secondary metabolites	Biosynthesis of other antibiotics	K09460 K02078+K14245+K14246+K22798 K22799 K22800 K21272 K21271 K22801 K22802	0.03125	False	K02078
688105	Bin_Rhodococcus_rhodnii	M00039	Monolignol biosynthesis. phenylalanine/tyrosine => monolignol	Pathway modules	Biosynthesis of other secondary metabolites	Biosynthesis of phytochemical compounds	(K10775.K13064) K00487 K01904 K13065 K09754 K00588 K09753 K09755 K13066 (K00083.K22395)	0.2	False	K01904.K00588
688106	Bin_Rhodococcus_rhodnii	M00137	Flavanone biosynthesis. phenylalanine => naringenin	Pathway modules	Biosynthesis of other secondary metabolites	Biosynthesis of phytochemical compounds	K10775 K00487 K01904 K00660 K01859	0.2	False	K01904
688107	Bin_Rhodococcus_rhodnii	M00736	Nocardicin A biosynthesis. L-pHPG + arginine + serine => nocardicin A	Pathway modules	Biosynthesis of other secondary metabolites	Biosynthesis of beta-lactams	K19102+K19103+K05375 K19104 K19105 K19106	0.0833333	False	K05375
688109	Bin_Rhodococcus_rhodnii	M00835	Pyocyanine biosynthesis. chorismate => pyocyanine	Pathway modules	Biosynthesis of other secondary metabolites	Biosynthesis of other bacterial compounds	K13063 K20261 K06998 K20260 K20262 K21103 K20940	0.142857	False	K06998
688108	Bin_Rhodococcus_rhodnii	M00848	Aurachin biosynthesis. anthranilate => aurachin A	Pathway modules	Biosynthesis of other secondary metabolites	Biosynthesis of other antibiotics	K09460 K02078+K14245+K14246+K22798 K22799 K22800 K21272 K21271 K22801 K22802	0.03125	False	K02078
688111	Bin_Rhodococcus_rhodnii	M00905	Grixazone biosynthesis. aspartate 4-semialdehyde => grixazone B	Pathway modules	Biosynthesis of other secondary metabolites	Biosynthesis of other bacterial compounds	K18287 K17835 K20204	0.666667	False	K17835.K18287
688110	Bin_Rhodococcus_rhodnii	M00921	Cyclooctatin biosynthesis. dimethylallyl-PP + isopentenyl-PP => cyclooctatin	Pathway modules	Biosynthesis of other secondary metabolites	Biosynthesis of other bacterial compounds	K13787 K18686 K22997 K22998	0.25	False	K13787

## Sheet: Glycan metabolism
unique_id	bin_name	kegg_module	module_name	module_class	module_category	module_subcategory	module_definition	module_completeness	module_is_complete	kofam_hits_in_module
468493	Bin_Enterococcus_faecalis	M00079	Keratan sulfate degradation	Pathway modules	Glycan metabolism	Glycosaminoglycan metabolism	K1802 K12979 K1807 K13043	0.2	False	K12373
573071	Bin_Kocuria	M00872	O-glycan biosynthesis. mannose type (core M3)	Pathway modules	Glycan metabolism	Glycan biosynthesis	K00728 K18207 K09654 K17547 K21031 K19872 K19873 K21052 K21032 K09668	0.1	False	K00728
816546	Bin_Pectobacterium	M00866	KDO2-lipid A biosynthesis. Raetz pathway. non-LpxL-LpxM type	Pathway modules	Glycan metabolism	Lipopolysaccharide metabolism	K00677 (K02535.K16363) K02536 (K03269.K09949) K00748 K00912 K02527 K02517 K09778	0.777778	True	K00912.K02536.K00748.K02517.K00677.K02535.K02527
816545	Bin_Pectobacterium	M00060	KDO2-lipid A biosynthesis. Raetz pathway. LpxL-LpxM type	Pathway modules	Glycan metabolism	Lipopolysaccharide metabolism	K00677 K02535 K02536 (K03269.K09949) K00748 K00912 K02527 K02517 K02560	0.888889	True	K00912.K02560.K02536.K00748.K02517.K00677.K02535.K02527
816548	Bin_Pectobacterium	M00064	ADP-L-glycero-D-manno-heptose biosynthesis	Pathway modules	Glycan metabolism	Lipopolysaccharide metabolism	K03271 (K03272.K21344) K03273 (K03272.K21345) K03274	1	True	K03271.K03272.K03273.K03274
816547	Bin_Pectobacterium	M00063	CMP-KDO biosynthesis	Pathway modules	Glycan metabolism	Lipopolysaccharide metabolism	K06041 K01627 K03270 K00979	1	True	K00979.K01627.K03270.K06041
688051	Bin_Rhodococcus_rhodnii	M00872	O-glycan biosynthesis. mannose type (core M3)	Pathway modules	Glycan metabolism	Glycan biosynthesis	K00728 K18207 K09654 K17547 K21031 K19872 K19873 K21052 K21032 K09668	0.1	False	K00728

## Sheet: Lipid metabolism
unique_id	bin_name	kegg_module	module_name	module_class	module_category	module_subcategory	module_definition	module_completeness	module_is_complete	kofam_hits_in_module
468455	Bin_Enterococcus_faecalis	M00088	Ketone body biosynthesis. acetyl-CoA => acetoacetate/3-hydroxybutyrate/acetone	Pathway modules	Lipid metabolism	Lipid metabolism	K00626 K01641 K01640 K00019 K01574	0.4	False	K00626.K01641
468457	Bin_Enterococcus_faecalis	M00093	Phosphatidylethanolamine (PE) biosynthesis. PA => PS => PE	Pathway modules	Lipid metabolism	Lipid metabolism	K00981 (K00998.K17103) K01613	0.333333	False	K00981
468456	Bin_Enterococcus_faecalis	M00089	Triacylglycerol biosynthesis	Pathway modules	Lipid metabolism	Lipid metabolism	(K00629.K13506.K13507.K00630.K13508) (K00655.K13509.K13523.K19007.K13513.K13517.K13519.K14674.K22831) (K01080.K15728.K18693) (K11155.K11160.K14456.K22848.K22849)	0.25	False	K00655
573021	Bin_Kocuria	M00087	beta-Oxidation	Pathway modules	Lipid metabolism	Fatty acid metabolism	(K00232.K00249.K00255.K06445.K09479) (((K01692.K07511.K13767) (K00022.K07516)).K01825.K01782.K07514.K07515.K10527) (K00632.K07508.K07509.K07513)	0.75	True	K01692.K00632.K00232.K00249
573020	Bin_Kocuria	M00086	beta-Oxidation. acyl-CoA synthesis	Pathway modules	Lipid metabolism	Fatty acid metabolism	K01897.K15013	1	True	K01897
573022	Bin_Kocuria	M00861	beta-Oxidation. peroxisome. VLCFA	Pathway modules	Lipid metabolism	Fatty acid metabolism	K00232 K12405 (K07513.K08764)	0.333333	False	K00232
573018	Bin_Kocuria	M00873	Fatty acid biosynthesis in mitochondria. animals	Pathway modules	Lipid metabolism	Fatty acid metabolism	K18660 K03955+K00645 K09458 K11539+K13370 K22540 K07512	0.25	False	K00645.K09458
573019	Bin_Kocuria	M00874	Fatty acid biosynthesis in mitochondria. fungi	Pathway modules	Lipid metabolism	Fatty acid metabolism	K11262 K03955+K00645 K09458 K00059 K22541 K07512	0.416667	False	K00645.K09458.K00059
573017	Bin_Kocuria	M00083	Fatty acid biosynthesis. elongation	Pathway modules	Lipid metabolism	Fatty acid metabolism	K00665.(K00667 K00668).K11533.((K00647.K09458) K00059 (K02372.K01716.K16363) (K00208.K02371.K10780.K00209))	0.5	False	K09458.K00059
573016	Bin_Kocuria	M00082	Fatty acid biosynthesis. initiation	Pathway modules	Lipid metabolism	Fatty acid metabolism	(K11262.(K02160+K01961.K11263)+(K01962+K01963.K18472)) (K00665.K00667+K00668.K11533.(K00645 (K00648.K18473)))	0.833333	True	K00645.K00648.K11263
573026	Bin_Kocuria	M00113	Jasmonic acid biosynthesis	Pathway modules	Lipid metabolism	Lipid metabolism	K00454 K01723 K10525 K05894 K10526 K00232 K10527 K07513 --	0.111111	False	K00232
573023	Bin_Kocuria	M00088	Ketone body biosynthesis. acetyl-CoA => acetoacetate/3-hydroxybutyrate/acetone	Pathway modules	Lipid metabolism	Lipid metabolism	K00626 K01641 K01640 K00019 K01574	0.4	False	K00626.K00019
573025	Bin_Kocuria	M00093	Phosphatidylethanolamine (PE) biosynthesis. PA => PS => PE	Pathway modules	Lipid metabolism	Lipid metabolism	K00981 (K00998.K17103) K01613	0.333333	False	K00981
573024	Bin_Kocuria	M00089	Triacylglycerol biosynthesis	Pathway modules	Lipid metabolism	Lipid metabolism	(K00629.K13506.K13507.K00630.K13508) (K00655.K13509.K13523.K19007.K13513.K13517.K13519.K14674.K22831) (K01080.K15728.K18693) (K11155.K11160.K14456.K22848.K22849)	0.25	False	K00655
816503	Bin_Pectobacterium	M00873	Fatty acid biosynthesis in mitochondria. animals	Pathway modules	Lipid metabolism	Fatty acid metabolism	K18660 K03955+K00645 K09458 K11539+K13370 K22540 K07512	0.25	False	K00645.K09458
816504	Bin_Pectobacterium	M00874	Fatty acid biosynthesis in mitochondria. fungi	Pathway modules	Lipid metabolism	Fatty acid metabolism	K11262 K03955+K00645 K09458 K00059 K22541 K07512	0.416667	False	K00645.K09458.K00059
816502	Bin_Pectobacterium	M00083	Fatty acid biosynthesis. elongation	Pathway modules	Lipid metabolism	Fatty acid metabolism	K00665.(K00667 K00668).K11533.((K00647.K09458) K00059 (K02372.K01716.K16363) (K00208.K02371.K10780.K00209))	1	True	K00208.K09458.K00059.K00647.K02372.K01716
816501	Bin_Pectobacterium	M00082	Fatty acid biosynthesis. initiation	Pathway modules	Lipid metabolism	Fatty acid metabolism	(K11262.(K02160+K01961.K11263)+(K01962+K01963.K18472)) (K00665.K00667+K00668.K11533.(K00645 (K00648.K18473)))	0.888889	True	K00645.K00648.K01962.K01963
816505	Bin_Pectobacterium	M00088	Ketone body biosynthesis. acetyl-CoA => acetoacetate/3-hydroxybutyrate/acetone	Pathway modules	Lipid metabolism	Lipid metabolism	K00626 K01641 K01640 K00019 K01574	0.2	False	K00626
816507	Bin_Pectobacterium	M00093	Phosphatidylethanolamine (PE) biosynthesis. PA => PS => PE	Pathway modules	Lipid metabolism	Lipid metabolism	K00981 (K00998.K17103) K01613	0.666667	False	K00981.K00998
816506	Bin_Pectobacterium	M00089	Triacylglycerol biosynthesis	Pathway modules	Lipid metabolism	Lipid metabolism	(K00629.K13506.K13507.K00630.K13508) (K00655.K13509.K13523.K19007.K13513.K13517.K13519.K14674.K22831) (K01080.K15728.K18693) (K11155.K11160.K14456.K22848.K22849)	0.25	False	K00655
688001	Bin_Rhodococcus_rhodnii	M00098	Acylglycerol degradation	Pathway modules	Lipid metabolism	Lipid metabolism	(K01046.K12298.K16816.K13534.K14073.K14074.K14075.K14076.K22283.K14452.K22284.K14674.K14675.K17900) K01054	1	True	K01046.K01054
687994	Bin_Rhodococcus_rhodnii	M00087	beta-Oxidation	Pathway modules	Lipid metabolism	Fatty acid metabolism	(K00232.K00249.K00255.K06445.K09479) (((K01692.K07511.K13767) (K00022.K07516)).K01825.K01782.K07514.K07515.K10527) (K00632.K07508.K07509.K07513)	1	True	K00022.K00249.K00632.K01692.K00232.K01782
687993	Bin_Rhodococcus_rhodnii	M00086	beta-Oxidation. acyl-CoA synthesis	Pathway modules	Lipid metabolism	Fatty acid metabolism	K01897.K15013	1	True	K01897
687995	Bin_Rhodococcus_rhodnii	M00861	beta-Oxidation. peroxisome. VLCFA	Pathway modules	Lipid metabolism	Fatty acid metabolism	K00232 K12405 (K07513.K08764)	0.333333	False	K00232
687998	Bin_Rhodococcus_rhodnii	M00104	Bile acid biosynthesis. cholesterol => cholate/chenodeoxycholate	Pathway modules	Lipid metabolism	Sterol biosynthesis	K00489 K12408 K07431 K00251 K00037 K00488 K08748 K01796 K10214 K12405 K08764 K11992	0.0833333	False	K01796
687996	Bin_Rhodococcus_rhodnii	M00101	Cholesterol biosynthesis. squalene 2.3-epoxide => cholesterol	Pathway modules	Lipid metabolism	Sterol biosynthesis	K01852 K05917 K00222 K07750 K07748 K13373 K09828 K01824 K00227 K00213	0.1	False	K09828
687991	Bin_Rhodococcus_rhodnii	M00874	Fatty acid biosynthesis in mitochondria. fungi	Pathway modules	Lipid metabolism	Fatty acid metabolism	K11262 K03955+K00645 K09458 K00059 K22541 K07512	0.166667	False	K00059
687990	Bin_Rhodococcus_rhodnii	M00083	Fatty acid biosynthesis. elongation	Pathway modules	Lipid metabolism	Fatty acid metabolism	K00665.(K00667 K00668).K11533.((K00647.K09458) K00059 (K02372.K01716.K16363) (K00208.K02371.K10780.K00209))	1	True	K00059.K11533
687989	Bin_Rhodococcus_rhodnii	M00082	Fatty acid biosynthesis. initiation	Pathway modules	Lipid metabolism	Fatty acid metabolism	(K11262.(K02160+K01961.K11263)+(K01962+K01963.K18472)) (K00665.K00667+K00668.K11533.(K00645 (K00648.K18473)))	1	True	K11263.K00648.K18472.K11533
687992	Bin_Rhodococcus_rhodnii	M00085	Fatty acid elongation in mitochondria	Pathway modules	Lipid metabolism	Fatty acid metabolism	(K07508.K07509) (K00022 K07511.K07515) K07512	0.25	False	K00022
688004	Bin_Rhodococcus_rhodnii	M00113	Jasmonic acid biosynthesis	Pathway modules	Lipid metabolism	Lipid metabolism	K00454 K01723 K10525 K05894 K10526 K00232 K10527 K07513 --	0.111111	False	K00232
687999	Bin_Rhodococcus_rhodnii	M00088	Ketone body biosynthesis. acetyl-CoA => acetoacetate/3-hydroxybutyrate/acetone	Pathway modules	Lipid metabolism	Lipid metabolism	K00626 K01641 K01640 K00019 K01574	0.4	False	K00626.K00019
688002	Bin_Rhodococcus_rhodnii	M00093	Phosphatidylethanolamine (PE) biosynthesis. PA => PS => PE	Pathway modules	Lipid metabolism	Lipid metabolism	K00981 (K00998.K17103) K01613	1	True	K01613.K17103.K00981
687997	Bin_Rhodococcus_rhodnii	M00917	Phytosterol biosynthesis. squalene 2.3-epoxide => campesterol/sitosterol	Pathway modules	Lipid metabolism	Sterol biosynthesis	K01853 K00559 K14423 K23558 -- K08246 K05917 K00222 K01824 K08242 K14424 K00227 K00213 K09828	0.0714286	False	K09828
688003	Bin_Rhodococcus_rhodnii	M00099	Sphingosine biosynthesis	Pathway modules	Lipid metabolism	Lipid metabolism	K00654 K04708 (K04709.K04710.K24621.K24622.K23727) K04712 (K01441.K12348.K12349)	0.2	False	K12349
688000	Bin_Rhodococcus_rhodnii	M00089	Triacylglycerol biosynthesis	Pathway modules	Lipid metabolism	Lipid metabolism	(K00629.K13506.K13507.K00630.K13508) (K00655.K13509.K13523.K19007.K13513.K13517.K13519.K14674.K22831) (K01080.K15728.K18693) (K11155.K11160.K14456.K22848.K22849)	0.25	False	K00655

## Sheet: Metabo. of vitamins & cofactors
unique_id	bin_name	kegg_module	module_name	module_class	module_category	module_subcategory	module_definition	module_completeness	module_is_complete	kofam_hits_in_module
468514	Bin_Enterococcus_faecalis	M00140	C1-unit interconversion. prokaryotes	Pathway modules	Metabolism of cofactors and vitamins	Cofactor and vitamin metabolism	K00600 (K01491.(K00300 K01500)) K01938	0.666667	False	K01491.K01938
468516	Bin_Enterococcus_faecalis	M00122	Cobalamin biosynthesis. cobyrinate a.c-diamide => cobalamin	Pathway modules	Metabolism of cofactors and vitamins	Cofactor and vitamin metabolism	(K00798.K19221) K02232 (K02225.K02227) K02231 K00768 (K02226.K22316) K02233	0.142857	False	K00798
468506	Bin_Enterococcus_faecalis	M00914	Coenzyme A biosynthesis. archaea. 2-oxoisovalerate => 4-phosphopantoate => CoA	Pathway modules	Metabolism of cofactors and vitamins	Cofactor and vitamin metabolism	K00606 K00077 K06982 K09722 K13038 K02201 K09735	0.142857	False	K00077
468505	Bin_Enterococcus_faecalis	M00120	Coenzyme A biosynthesis. pantothenate => CoA	Pathway modules	Metabolism of cofactors and vitamins	Cofactor and vitamin metabolism	(K00867.K03525.K01947.K09680) ((K01922.K21977) K01598.K13038) (K02318.(K00954.K02201) K00859)	0.75	True	K00954.K00867.K00859
468515	Bin_Enterococcus_faecalis	M00121	Heme biosynthesis. plants and bacteria. glutamate => heme	Pathway modules	Metabolism of cofactors and vitamins	Cofactor and vitamin metabolism	K01885 K02492 K01845 K01698 K01749 (K01719.K13542.K13543) K01599 (K00228.K02495) (K00230.K00231.K08973) K01772	0.2	False	K02495.K01885
468507	Bin_Enterococcus_faecalis	M00883	Lipoic acid biosynthesis. animals and bacteria. octanoyl-ACP => dihydrolipoyl-H => dihydrolipoyl-E2	Pathway modules	Metabolism of cofactors and vitamins	Cofactor and vitamin metabolism	(K23735.K23734) K03644 (K10105.K16869)	0.333333	False	K16869
468512	Bin_Enterococcus_faecalis	M00843	L-threo-Tetrahydrobiopterin biosynthesis. GTP => L-threo-BH4	Pathway modules	Metabolism of cofactors and vitamins	Cofactor and vitamin metabolism	K01495 K01737 K17745	0.333333	False	K01495
468517	Bin_Enterococcus_faecalis	M00116	Menaquinone biosynthesis. chorismate (+ polyprenyl-PP) => menaquinol	Pathway modules	Metabolism of cofactors and vitamins	Cofactor and vitamin metabolism	K02552 K02551 K08680 K02549 K01911 K01661 K19222 K02548 K03183	0.777778	True	K08680.K02551.K01661.K02549.K19222.K02548.K01911
468513	Bin_Enterococcus_faecalis	M00880	Molybdenum cofactor biosynthesis. GTP => molybdenum cofactor	Pathway modules	Metabolism of cofactors and vitamins	Cofactor and vitamin metabolism	((K03639 K03637).K20967) (K03635.K21142) (((K03831.K03638) K03750).K15376)	0.6	False	K03639.K03637.K03750
468501	Bin_Enterococcus_faecalis	M00115	NAD biosynthesis. aspartate => quinolinate => NAD	Pathway modules	Metabolism of cofactors and vitamins	Cofactor and vitamin metabolism	(K00278.K06989) K03517 K00767 (K00969.K06210) (K01916.K01950)	0.2	False	K01916
468502	Bin_Enterococcus_faecalis	M00912	NAD biosynthesis. tryptophan => quinolinate => NAD	Pathway modules	Metabolism of cofactors and vitamins	Cofactor and vitamin metabolism	(K00453.K00463) (K01432.K14263.K07130) K00486 K01556 K00452 K00767 (K00969.K06210) (K01916.K01950)	0.125	False	K01916
468504	Bin_Enterococcus_faecalis	M00913	Pantothenate biosynthesis. 2-oxoisovalerate/spermine => pantothenate	Pathway modules	Metabolism of cofactors and vitamins	Cofactor and vitamin metabolism	K00606 K00077 K13367 K00128 K01918	0.2	False	K00077
468503	Bin_Enterococcus_faecalis	M00119	Pantothenate biosynthesis. valine/L-aspartate => pantothenate	Pathway modules	Metabolism of cofactors and vitamins	Cofactor and vitamin metabolism	K00826 K00606 K00077 K01579 (K01918.K13799)	0.4	False	K00077.K00826
468518	Bin_Enterococcus_faecalis	M00932	Phylloquinone biosynthesis. chorismate (+ phytyl-PP) => phylloquinol	Pathway modules	Metabolism of cofactors and vitamins	Cofactor and vitamin metabolism	(K02552 K02551 K08680 K02549.K14759) (K01911.K14760) K01661 (K19222.K12073) K23094 K17872 K23095	0.6	False	K08680.K02551.K01661.K02549.K19222.K01911
468500	Bin_Enterococcus_faecalis	M00125	Riboflavin biosynthesis. plants and bacteria. GTP => riboflavin/FMN/FAD	Pathway modules	Metabolism of cofactors and vitamins	Cofactor and vitamin metabolism	(K01497.K14652) (K01498 K00082.K11752) (K22912.K20860.K20861.K20862.K21063.K21064) (K02858.K14652) K00794 K00793 (K20884 K22949.K11753)	0.285714	False	K21064.K11753
468511	Bin_Enterococcus_faecalis	M00842	Tetrahydrobiopterin biosynthesis. GTP => BH4	Pathway modules	Metabolism of cofactors and vitamins	Cofactor and vitamin metabolism	K01495 K01737 K00072	0.333333	False	K01495
468508	Bin_Enterococcus_faecalis	M00126	Tetrahydrofolate biosynthesis. GTP => THF	Pathway modules	Metabolism of cofactors and vitamins	Cofactor and vitamin metabolism	(K01495.K09007.K22391) (K01077.K01113.(K08310.K19965)) ((K13939.(K13940.K01633 K00950) K00796).(K01633 K13941)) (K11754.K20457) (K00287.K13998)	0.714286	False	K00796.K00950.K01495.K01633.K00287.K22391
468510	Bin_Enterococcus_faecalis	M00841	Tetrahydrofolate biosynthesis. mediated by PTPS. GTP => THF	Pathway modules	Metabolism of cofactors and vitamins	Cofactor and vitamin metabolism	K01495 K22101 K13941 K11754 K13998	0.2	False	K01495
468509	Bin_Enterococcus_faecalis	M00840	Tetrahydrofolate biosynthesis. mediated by ribA and trpF. GTP => THF	Pathway modules	Metabolism of cofactors and vitamins	Cofactor and vitamin metabolism	K14652 K22100 -- K01633 K13941 K22099 K00287	0.285714	False	K01633.K00287
468496	Bin_Enterococcus_faecalis	M00896	Thiamine biosynthesis. archaea. AIR (+ NAD+) => TMP/TPP	Pathway modules	Metabolism of cofactors and vitamins	Cofactor and vitamin metabolism	K22699 K03147 (K00941 (K00788.K21220).K21219) K00946	0.4	False	K00941.K00788
468497	Bin_Enterococcus_faecalis	M00897	Thiamine biosynthesis. plants. AIR (+ NAD+) => TMP/thiamine/TPP	Pathway modules	Metabolism of cofactors and vitamins	Cofactor and vitamin metabolism	K03146 K03147 K14153 K22911 K00949	0.2	False	K00949
468495	Bin_Enterococcus_faecalis	M00895	Thiamine biosynthesis. prokaryotes. AIR (+ DXP/glycine) => TMP/TPP	Pathway modules	Metabolism of cofactors and vitamins	Cofactor and vitamin metabolism	K03148+K03154 K03151 K03153 K03149 K10810 K03147 K00941 K00788 K00946	0.222222	False	K00941.K00788
468494	Bin_Enterococcus_faecalis	M00127	Thiamine biosynthesis. prokaryotes. AIR (+ DXP/tyrosine) => TMP/TPP	Pathway modules	Metabolism of cofactors and vitamins	Cofactor and vitamin metabolism	K03148+K03154 K03151 K03150 K03149 K03147 ((K00941 K00788).K14153.K21219) K00946	0.25	False	K00941.K00788
468498	Bin_Enterococcus_faecalis	M00898	Thiamine biosynthesis. pyridoxal-5P => TMP/thiamine/TPP	Pathway modules	Metabolism of cofactors and vitamins	Cofactor and vitamin metabolism	K03146 K18278 K00877 K14154 -- K00949	0.166667	False	K00949
468499	Bin_Enterococcus_faecalis	M00899	Thiamine salvage pathway. HMP/HET => TMP	Pathway modules	Metabolism of cofactors and vitamins	Cofactor and vitamin metabolism	K00878 ((K00941 K00788).K14153.K21219)	1	True	K00941.K00788.K00878
573088	Bin_Kocuria	M00573	Biotin biosynthesis. BioI pathway. long-chain-acyl-ACP => pimeloyl-ACP => biotin	Pathway modules	Metabolism of cofactors and vitamins	Cofactor and vitamin metabolism	K16593 K00652 K19563 K01935 K01012	0.6	False	K00652.K01012.K01935
573089	Bin_Kocuria	M00577	Biotin biosynthesis. BioW pathway. pimelate => pimeloyl-CoA => biotin	Pathway modules	Metabolism of cofactors and vitamins	Cofactor and vitamin metabolism	K01906 K00652 (K00833.K19563) K01935 K01012	0.8	True	K00652.K01012.K01935.K00833
573087	Bin_Kocuria	M00123	Biotin biosynthesis. pimeloyl-ACP/CoA => biotin	Pathway modules	Metabolism of cofactors and vitamins	Cofactor and vitamin metabolism	K00652 ((K00833.K19563) K01935.K19562) K01012	1	True	K00652.K01012.K01935.K00833
573101	Bin_Kocuria	M00141	C1-unit interconversion. eukaryotes	Pathway modules	Metabolism of cofactors and vitamins	Cofactor and vitamin metabolism	K00600 (K00288.(K13403 K13402))	0.5	False	K00600
573100	Bin_Kocuria	M00140	C1-unit interconversion. prokaryotes	Pathway modules	Metabolism of cofactors and vitamins	Cofactor and vitamin metabolism	K00600 (K01491.(K00300 K01500)) K01938	0.666667	False	K01491.K00600
573107	Bin_Kocuria	M00925	Cobalamin biosynthesis. aerobic. uroporphyrinogen III => precorrin 2 => cobyrinate a.c-diamide	Pathway modules	Metabolism of cofactors and vitamins	Cofactor and vitamin metabolism	(K02303.K13542) (K03394.K13540) K02229 (K05934.K13540.K13541) K05936 K02228 K05895 K00595 K06042 K02224 K02230+K09882+K09883	0.0909091	False	K02303
573106	Bin_Kocuria	M00924	Cobalamin biosynthesis. anaerobic. uroporphyrinogen III => sirohydrochlorin => cobyrinate a.c-diamide	Pathway modules	Metabolism of cofactors and vitamins	Cofactor and vitamin metabolism	(K02302.(K02303.K13542) K02304) (K02190.K03795.K22011) K03394 (K05934.K13541.K21479) K05936 (K02189.K13541) K02188 K05895 (K02191 K03399.K00595) K06042 K02224	0.181818	False	K02302.K02303.K03795
573085	Bin_Kocuria	M00914	Coenzyme A biosynthesis. archaea. 2-oxoisovalerate => 4-phosphopantoate => CoA	Pathway modules	Metabolism of cofactors and vitamins	Cofactor and vitamin metabolism	K00606 K00077 K06982 K09722 K13038 K02201 K09735	0.285714	False	K00606.K13038
573084	Bin_Kocuria	M00120	Coenzyme A biosynthesis. pantothenate => CoA	Pathway modules	Metabolism of cofactors and vitamins	Cofactor and vitamin metabolism	(K00867.K03525.K01947.K09680) ((K01922.K21977) K01598.K13038) (K02318.(K00954.K02201) K00859)	1	True	K00859.K00867.K00954.K13038
573103	Bin_Kocuria	M00868	Heme biosynthesis. animals and fungi. glycine => heme	Pathway modules	Metabolism of cofactors and vitamins	Cofactor and vitamin metabolism	K00643 K01698 K01749 K01719 K01599 K00228 K00231 K01772	0.75	True	K01772.K01749.K01698.K01719.K01599.K00231
573105	Bin_Kocuria	M00926	Heme biosynthesis. bacteria. glutamyl-tRNA => coproporphyrin III => heme	Pathway modules	Metabolism of cofactors and vitamins	Cofactor and vitamin metabolism	K02492 K01845 K01698 K01749 (K01719.K13542) K01599 K00231 K01772 K00435	0.888889	True	K01772.K01749.K01698.K01845.K01719.K01599.K02492.K00231
573104	Bin_Kocuria	M00121	Heme biosynthesis. plants and bacteria. glutamate => heme	Pathway modules	Metabolism of cofactors and vitamins	Cofactor and vitamin metabolism	K01885 K02492 K01845 K01698 K01749 (K01719.K13542.K13543) K01599 (K00228.K02495) (K00230.K00231.K08973) K01772	1	True	K01772.K01749.K01698.K01845.K01719.K02495.K01885.K01599.K02492.K00231
573092	Bin_Kocuria	M00883	Lipoic acid biosynthesis. animals and bacteria. octanoyl-ACP => dihydrolipoyl-H => dihydrolipoyl-E2	Pathway modules	Metabolism of cofactors and vitamins	Cofactor and vitamin metabolism	(K23735.K23734) K03644 (K10105.K16869)	0.666667	False	K03644.K16869
573091	Bin_Kocuria	M00882	Lipoic acid biosynthesis. eukaryotes. octanoyl-ACP => dihydrolipoyl-H	Pathway modules	Metabolism of cofactors and vitamins	Cofactor and vitamin metabolism	K23735 K03644	0.5	False	K03644
573093	Bin_Kocuria	M00884	Lipoic acid biosynthesis. octanoyl-CoA => dihydrolipoyl-E2	Pathway modules	Metabolism of cofactors and vitamins	Cofactor and vitamin metabolism	K23750 K03644	0.5	False	K03644
573090	Bin_Kocuria	M00881	Lipoic acid biosynthesis. plants and bacteria. octanoyl-ACP => dihydrolipoyl-E2/H	Pathway modules	Metabolism of cofactors and vitamins	Cofactor and vitamin metabolism	K03801 K03644	1	True	K03644.K03801
573098	Bin_Kocuria	M00843	L-threo-Tetrahydrobiopterin biosynthesis. GTP => L-threo-BH4	Pathway modules	Metabolism of cofactors and vitamins	Cofactor and vitamin metabolism	K01495 K01737 K17745	0.333333	False	K01495
573108	Bin_Kocuria	M00116	Menaquinone biosynthesis. chorismate (+ polyprenyl-PP) => menaquinol	Pathway modules	Metabolism of cofactors and vitamins	Cofactor and vitamin metabolism	K02552 K02551 K08680 K02549 K01911 K01661 K19222 K02548 K03183	0.777778	True	K19222.K02551.K02552.K01661.K02549.K02548.K01911
573099	Bin_Kocuria	M00880	Molybdenum cofactor biosynthesis. GTP => molybdenum cofactor	Pathway modules	Metabolism of cofactors and vitamins	Cofactor and vitamin metabolism	((K03639 K03637).K20967) (K03635.K21142) (((K03831.K03638) K03750).K15376)	0.8	True	K03639.K03637.K03635.K03750
573080	Bin_Kocuria	M00115	NAD biosynthesis. aspartate => quinolinate => NAD	Pathway modules	Metabolism of cofactors and vitamins	Cofactor and vitamin metabolism	(K00278.K06989) K03517 K00767 (K00969.K06210) (K01916.K01950)	1	True	K01916.K00969.K00278.K03517.K00767
573081	Bin_Kocuria	M00912	NAD biosynthesis. tryptophan => quinolinate => NAD	Pathway modules	Metabolism of cofactors and vitamins	Cofactor and vitamin metabolism	(K00453.K00463) (K01432.K14263.K07130) K00486 K01556 K00452 K00767 (K00969.K06210) (K01916.K01950)	0.5	False	K01916.K00969.K07130.K00767
573083	Bin_Kocuria	M00913	Pantothenate biosynthesis. 2-oxoisovalerate/spermine => pantothenate	Pathway modules	Metabolism of cofactors and vitamins	Cofactor and vitamin metabolism	K00606 K00077 K13367 K00128 K01918	0.4	False	K00606.K01918
573082	Bin_Kocuria	M00119	Pantothenate biosynthesis. valine/L-aspartate => pantothenate	Pathway modules	Metabolism of cofactors and vitamins	Cofactor and vitamin metabolism	K00826 K00606 K00077 K01579 (K01918.K13799)	0.8	True	K00606.K00826.K01579.K01918
573109	Bin_Kocuria	M00932	Phylloquinone biosynthesis. chorismate (+ phytyl-PP) => phylloquinol	Pathway modules	Metabolism of cofactors and vitamins	Cofactor and vitamin metabolism	(K02552 K02551 K08680 K02549.K14759) (K01911.K14760) K01661 (K19222.K12073) K23094 K17872 K23095	0.6	False	K19222.K02551.K02552.K01661.K02549.K01911
573086	Bin_Kocuria	M00572	Pimeloyl-ACP biosynthesis. BioC-BioH pathway. malonyl-ACP => pimeloyl-ACP	Pathway modules	Metabolism of cofactors and vitamins	Cofactor and vitamin metabolism	K02169 (K00647.K09458) K00059 K02372 K00208 (K02170.K09789.K19560.K19561)	0.333333	False	K09458.K00059
573078	Bin_Kocuria	M00124	Pyridoxal-P biosynthesis. erythrose-4P => pyridoxal-P	Pathway modules	Metabolism of cofactors and vitamins	Cofactor and vitamin metabolism	K03472 K03473 K00831 K00097 K03474 K00275	0.166667	False	K00831
573079	Bin_Kocuria	M00916	Pyridoxal-P biosynthesis. R5P + glyceraldehyde-3P + glutamine => pyridoxal-P	Pathway modules	Metabolism of cofactors and vitamins	Cofactor and vitamin metabolism	K06215+K08681	1	True	K08681.K06215
573077	Bin_Kocuria	M00911	Riboflavin biosynthesis. fungi. GTP => riboflavin/FMN/FAD	Pathway modules	Metabolism of cofactors and vitamins	Cofactor and vitamin metabolism	K01497 K14654 K14655 -- K02858 K00794 K00793 K00861 K00953	0.444444	False	K02858.K00793.K00794.K01497
573076	Bin_Kocuria	M00125	Riboflavin biosynthesis. plants and bacteria. GTP => riboflavin/FMN/FAD	Pathway modules	Metabolism of cofactors and vitamins	Cofactor and vitamin metabolism	(K01497.K14652) (K01498 K00082.K11752) (K22912.K20860.K20861.K20862.K21063.K21064) (K02858.K14652) K00794 K00793 (K20884 K22949.K11753)	1	True	K02858.K00793.K00794.K01497.K11752.K11753.K21064
573102	Bin_Kocuria	M00846	Siroheme biosynthesis. glutamyl-tRNA => siroheme	Pathway modules	Metabolism of cofactors and vitamins	Cofactor and vitamin metabolism	K02492 K01845 K01698 K01749 (K01719.K13542.K13543) (K02302.(K00589.K02303.K02496.K13542.K13543)+K02304-K03794)	1	True	K01749.K01698.K01845.K01719.K02302.K02303.K02492
573097	Bin_Kocuria	M00842	Tetrahydrobiopterin biosynthesis. GTP => BH4	Pathway modules	Metabolism of cofactors and vitamins	Cofactor and vitamin metabolism	K01495 K01737 K00072	0.333333	False	K01495
573094	Bin_Kocuria	M00126	Tetrahydrofolate biosynthesis. GTP => THF	Pathway modules	Metabolism of cofactors and vitamins	Cofactor and vitamin metabolism	(K01495.K09007.K22391) (K01077.K01113.(K08310.K19965)) ((K13939.(K13940.K01633 K00950) K00796).(K01633 K13941)) (K11754.K20457) (K00287.K13998)	1	True	K01113.K11754.K00287.K00796.K00950.K01495.K01633
573096	Bin_Kocuria	M00841	Tetrahydrofolate biosynthesis. mediated by PTPS. GTP => THF	Pathway modules	Metabolism of cofactors and vitamins	Cofactor and vitamin metabolism	K01495 K22101 K13941 K11754 K13998	0.4	False	K11754.K01495
573095	Bin_Kocuria	M00840	Tetrahydrofolate biosynthesis. mediated by ribA and trpF. GTP => THF	Pathway modules	Metabolism of cofactors and vitamins	Cofactor and vitamin metabolism	K14652 K22100 -- K01633 K13941 K22099 K00287	0.285714	False	K00287.K01633
573074	Bin_Kocuria	M00896	Thiamine biosynthesis. archaea. AIR (+ NAD+) => TMP/TPP	Pathway modules	Metabolism of cofactors and vitamins	Cofactor and vitamin metabolism	K22699 K03147 (K00941 (K00788.K21220).K21219) K00946	0.6	False	K00941.K00788.K00946
573073	Bin_Kocuria	M00895	Thiamine biosynthesis. prokaryotes. AIR (+ DXP/glycine) => TMP/TPP	Pathway modules	Metabolism of cofactors and vitamins	Cofactor and vitamin metabolism	K03148+K03154 K03151 K03153 K03149 K10810 K03147 K00941 K00788 K00946	0.611111	False	K00941.K00788.K03153.K00946.K03149.K03154
573072	Bin_Kocuria	M00127	Thiamine biosynthesis. prokaryotes. AIR (+ DXP/tyrosine) => TMP/TPP	Pathway modules	Metabolism of cofactors and vitamins	Cofactor and vitamin metabolism	K03148+K03154 K03151 K03150 K03149 K03147 ((K00941 K00788).K14153.K21219) K00946	0.5625	False	K00941.K00788.K00946.K03149.K03154
573075	Bin_Kocuria	M00899	Thiamine salvage pathway. HMP/HET => TMP	Pathway modules	Metabolism of cofactors and vitamins	Cofactor and vitamin metabolism	K00878 ((K00941 K00788).K14153.K21219)	0.666667	False	K00941.K00788
816565	Bin_Pectobacterium	M00573	Biotin biosynthesis. BioI pathway. long-chain-acyl-ACP => pimeloyl-ACP => biotin	Pathway modules	Metabolism of cofactors and vitamins	Cofactor and vitamin metabolism	K16593 K00652 K19563 K01935 K01012	0.6	False	K00652.K01012.K01935
816566	Bin_Pectobacterium	M00577	Biotin biosynthesis. BioW pathway. pimelate => pimeloyl-CoA => biotin	Pathway modules	Metabolism of cofactors and vitamins	Cofactor and vitamin metabolism	K01906 K00652 (K00833.K19563) K01935 K01012	0.8	True	K00652.K01012.K01935.K00833
816564	Bin_Pectobacterium	M00123	Biotin biosynthesis. pimeloyl-ACP/CoA => biotin	Pathway modules	Metabolism of cofactors and vitamins	Cofactor and vitamin metabolism	K00652 ((K00833.K19563) K01935.K19562) K01012	1	True	K00652.K01012.K01935.K00833
816578	Bin_Pectobacterium	M00141	C1-unit interconversion. eukaryotes	Pathway modules	Metabolism of cofactors and vitamins	Cofactor and vitamin metabolism	K00600 (K00288.(K13403 K13402))	0.5	False	K00600
816577	Bin_Pectobacterium	M00140	C1-unit interconversion. prokaryotes	Pathway modules	Metabolism of cofactors and vitamins	Cofactor and vitamin metabolism	K00600 (K01491.(K00300 K01500)) K01938	0.666667	False	K01491.K00600
816584	Bin_Pectobacterium	M00925	Cobalamin biosynthesis. aerobic. uroporphyrinogen III => precorrin 2 => cobyrinate a.c-diamide	Pathway modules	Metabolism of cofactors and vitamins	Cofactor and vitamin metabolism	(K02303.K13542) (K03394.K13540) K02229 (K05934.K13540.K13541) K05936 K02228 K05895 K00595 K06042 K02224 K02230+K09882+K09883	0.0909091	False	K02303
816583	Bin_Pectobacterium	M00924	Cobalamin biosynthesis. anaerobic. uroporphyrinogen III => sirohydrochlorin => cobyrinate a.c-diamide	Pathway modules	Metabolism of cofactors and vitamins	Cofactor and vitamin metabolism	(K02302.(K02303.K13542) K02304) (K02190.K03795.K22011) K03394 (K05934.K13541.K21479) K05936 (K02189.K13541) K02188 K05895 (K02191 K03399.K00595) K06042 K02224	0.166667	False	K02304.K02302.K02303
816562	Bin_Pectobacterium	M00914	Coenzyme A biosynthesis. archaea. 2-oxoisovalerate => 4-phosphopantoate => CoA	Pathway modules	Metabolism of cofactors and vitamins	Cofactor and vitamin metabolism	K00606 K00077 K06982 K09722 K13038 K02201 K09735	0.428571	False	K00606.K00077.K13038
816561	Bin_Pectobacterium	M00120	Coenzyme A biosynthesis. pantothenate => CoA	Pathway modules	Metabolism of cofactors and vitamins	Cofactor and vitamin metabolism	(K00867.K03525.K01947.K09680) ((K01922.K21977) K01598.K13038) (K02318.(K00954.K02201) K00859)	1	True	K00867.K00859.K13038.K00954
816580	Bin_Pectobacterium	M00868	Heme biosynthesis. animals and fungi. glycine => heme	Pathway modules	Metabolism of cofactors and vitamins	Cofactor and vitamin metabolism	K00643 K01698 K01749 K01719 K01599 K00228 K00231 K01772	0.75	True	K01599.K01749.K01719.K00228.K01772.K01698
816582	Bin_Pectobacterium	M00926	Heme biosynthesis. bacteria. glutamyl-tRNA => coproporphyrin III => heme	Pathway modules	Metabolism of cofactors and vitamins	Cofactor and vitamin metabolism	K02492 K01845 K01698 K01749 (K01719.K13542) K01599 K00231 K01772 K00435	0.666667	False	K01599.K01749.K02492.K01719.K01772.K01698
816581	Bin_Pectobacterium	M00121	Heme biosynthesis. plants and bacteria. glutamate => heme	Pathway modules	Metabolism of cofactors and vitamins	Cofactor and vitamin metabolism	K01885 K02492 K01845 K01698 K01749 (K01719.K13542.K13543) K01599 (K00228.K02495) (K00230.K00231.K08973) K01772	0.9	True	K01599.K02495.K01885.K00230.K01749.K02492.K01719.K00228.K01772.K01698
816569	Bin_Pectobacterium	M00883	Lipoic acid biosynthesis. animals and bacteria. octanoyl-ACP => dihydrolipoyl-H => dihydrolipoyl-E2	Pathway modules	Metabolism of cofactors and vitamins	Cofactor and vitamin metabolism	(K23735.K23734) K03644 (K10105.K16869)	0.333333	False	K03644
816568	Bin_Pectobacterium	M00882	Lipoic acid biosynthesis. eukaryotes. octanoyl-ACP => dihydrolipoyl-H	Pathway modules	Metabolism of cofactors and vitamins	Cofactor and vitamin metabolism	K23735 K03644	0.5	False	K03644
816570	Bin_Pectobacterium	M00884	Lipoic acid biosynthesis. octanoyl-CoA => dihydrolipoyl-E2	Pathway modules	Metabolism of cofactors and vitamins	Cofactor and vitamin metabolism	K23750 K03644	0.5	False	K03644
816567	Bin_Pectobacterium	M00881	Lipoic acid biosynthesis. plants and bacteria. octanoyl-ACP => dihydrolipoyl-E2/H	Pathway modules	Metabolism of cofactors and vitamins	Cofactor and vitamin metabolism	K03801 K03644	1	True	K03644.K03801
816575	Bin_Pectobacterium	M00843	L-threo-Tetrahydrobiopterin biosynthesis. GTP => L-threo-BH4	Pathway modules	Metabolism of cofactors and vitamins	Cofactor and vitamin metabolism	K01495 K01737 K17745	0.666667	False	K01495.K01737
816586	Bin_Pectobacterium	M00116	Menaquinone biosynthesis. chorismate (+ polyprenyl-PP) => menaquinol	Pathway modules	Metabolism of cofactors and vitamins	Cofactor and vitamin metabolism	K02552 K02551 K08680 K02549 K01911 K01661 K19222 K02548 K03183	1	True	K08680.K02551.K02552.K01661.K02549.K01911.K02548.K19222.K03183
816576	Bin_Pectobacterium	M00880	Molybdenum cofactor biosynthesis. GTP => molybdenum cofactor	Pathway modules	Metabolism of cofactors and vitamins	Cofactor and vitamin metabolism	((K03639 K03637).K20967) (K03635.K21142) (((K03831.K03638) K03750).K15376)	0.5	False	K03750.K03831
816557	Bin_Pectobacterium	M00115	NAD biosynthesis. aspartate => quinolinate => NAD	Pathway modules	Metabolism of cofactors and vitamins	Cofactor and vitamin metabolism	(K00278.K06989) K03517 K00767 (K00969.K06210) (K01916.K01950)	0.4	False	K00969.K01916
816558	Bin_Pectobacterium	M00912	NAD biosynthesis. tryptophan => quinolinate => NAD	Pathway modules	Metabolism of cofactors and vitamins	Cofactor and vitamin metabolism	(K00453.K00463) (K01432.K14263.K07130) K00486 K01556 K00452 K00767 (K00969.K06210) (K01916.K01950)	0.25	False	K00969.K01916
816560	Bin_Pectobacterium	M00913	Pantothenate biosynthesis. 2-oxoisovalerate/spermine => pantothenate	Pathway modules	Metabolism of cofactors and vitamins	Cofactor and vitamin metabolism	K00606 K00077 K13367 K00128 K01918	0.6	False	K01918.K00606.K00077
816559	Bin_Pectobacterium	M00119	Pantothenate biosynthesis. valine/L-aspartate => pantothenate	Pathway modules	Metabolism of cofactors and vitamins	Cofactor and vitamin metabolism	K00826 K00606 K00077 K01579 (K01918.K13799)	1	True	K01918.K00606.K00826.K01579.K00077
816587	Bin_Pectobacterium	M00932	Phylloquinone biosynthesis. chorismate (+ phytyl-PP) => phylloquinol	Pathway modules	Metabolism of cofactors and vitamins	Cofactor and vitamin metabolism	(K02552 K02551 K08680 K02549.K14759) (K01911.K14760) K01661 (K19222.K12073) K23094 K17872 K23095	0.7	False	K08680.K02551.K02552.K01661.K02549.K01911.K19222
816563	Bin_Pectobacterium	M00572	Pimeloyl-ACP biosynthesis. BioC-BioH pathway. malonyl-ACP => pimeloyl-ACP	Pathway modules	Metabolism of cofactors and vitamins	Cofactor and vitamin metabolism	K02169 (K00647.K09458) K00059 K02372 K00208 (K02170.K09789.K19560.K19561)	1	True	K00208.K09458.K02169.K00059.K00647.K02372.K02170
816556	Bin_Pectobacterium	M00124	Pyridoxal-P biosynthesis. erythrose-4P => pyridoxal-P	Pathway modules	Metabolism of cofactors and vitamins	Cofactor and vitamin metabolism	K03472 K03473 K00831 K00097 K03474 K00275	1	True	K00831.K00275.K00097.K03472.K03473.K03474
816555	Bin_Pectobacterium	M00911	Riboflavin biosynthesis. fungi. GTP => riboflavin/FMN/FAD	Pathway modules	Metabolism of cofactors and vitamins	Cofactor and vitamin metabolism	K01497 K14654 K14655 -- K02858 K00794 K00793 K00861 K00953	0.444444	False	K01497.K02858.K00793.K00794
816554	Bin_Pectobacterium	M00125	Riboflavin biosynthesis. plants and bacteria. GTP => riboflavin/FMN/FAD	Pathway modules	Metabolism of cofactors and vitamins	Cofactor and vitamin metabolism	(K01497.K14652) (K01498 K00082.K11752) (K22912.K20860.K20861.K20862.K21063.K21064) (K02858.K14652) K00794 K00793 (K20884 K22949.K11753)	1	True	K11753.K01497.K21064.K20862.K02858.K00793.K00794.K11752
816579	Bin_Pectobacterium	M00846	Siroheme biosynthesis. glutamyl-tRNA => siroheme	Pathway modules	Metabolism of cofactors and vitamins	Cofactor and vitamin metabolism	K02492 K01845 K01698 K01749 (K01719.K13542.K13543) (K02302.(K00589.K02303.K02496.K13542.K13543)+K02304-K03794)	0.833333	True	K02496.K01749.K02492.K01719.K01698.K02304.K02302.K02303
816574	Bin_Pectobacterium	M00842	Tetrahydrobiopterin biosynthesis. GTP => BH4	Pathway modules	Metabolism of cofactors and vitamins	Cofactor and vitamin metabolism	K01495 K01737 K00072	0.666667	False	K01495.K01737
816571	Bin_Pectobacterium	M00126	Tetrahydrofolate biosynthesis. GTP => THF	Pathway modules	Metabolism of cofactors and vitamins	Cofactor and vitamin metabolism	(K01495.K09007.K22391) (K01077.K01113.(K08310.K19965)) ((K13939.(K13940.K01633 K00950) K00796).(K01633 K13941)) (K11754.K20457) (K00287.K13998)	1	True	K08310.K01077.K00796.K01633.K00287.K00950.K01495.K11754
816573	Bin_Pectobacterium	M00841	Tetrahydrofolate biosynthesis. mediated by PTPS. GTP => THF	Pathway modules	Metabolism of cofactors and vitamins	Cofactor and vitamin metabolism	K01495 K22101 K13941 K11754 K13998	0.4	False	K01495.K11754
816572	Bin_Pectobacterium	M00840	Tetrahydrofolate biosynthesis. mediated by ribA and trpF. GTP => THF	Pathway modules	Metabolism of cofactors and vitamins	Cofactor and vitamin metabolism	K14652 K22100 -- K01633 K13941 K22099 K00287	0.285714	False	K01633.K00287
816551	Bin_Pectobacterium	M00896	Thiamine biosynthesis. archaea. AIR (+ NAD+) => TMP/TPP	Pathway modules	Metabolism of cofactors and vitamins	Cofactor and vitamin metabolism	K22699 K03147 (K00941 (K00788.K21220).K21219) K00946	0.8	True	K00941.K00788.K00946.K03147
816552	Bin_Pectobacterium	M00897	Thiamine biosynthesis. plants. AIR (+ NAD+) => TMP/thiamine/TPP	Pathway modules	Metabolism of cofactors and vitamins	Cofactor and vitamin metabolism	K03146 K03147 K14153 K22911 K00949	0.2	False	K03147
816550	Bin_Pectobacterium	M00895	Thiamine biosynthesis. prokaryotes. AIR (+ DXP/glycine) => TMP/TPP	Pathway modules	Metabolism of cofactors and vitamins	Cofactor and vitamin metabolism	K03148+K03154 K03151 K03153 K03149 K10810 K03147 K00941 K00788 K00946	0.777778	True	K00941.K03149.K03148.K00788.K00946.K03151.K03147.K03154
816549	Bin_Pectobacterium	M00127	Thiamine biosynthesis. prokaryotes. AIR (+ DXP/tyrosine) => TMP/TPP	Pathway modules	Metabolism of cofactors and vitamins	Cofactor and vitamin metabolism	K03148+K03154 K03151 K03150 K03149 K03147 ((K00941 K00788).K14153.K21219) K00946	1	True	K00941.K03149.K03148.K00788.K00946.K03151.K03150.K03147.K03154
816553	Bin_Pectobacterium	M00899	Thiamine salvage pathway. HMP/HET => TMP	Pathway modules	Metabolism of cofactors and vitamins	Cofactor and vitamin metabolism	K00878 ((K00941 K00788).K14153.K21219)	1	True	K00941.K00878.K00788
816585	Bin_Pectobacterium	M00117	Ubiquinone biosynthesis. prokaryotes. chorismate (+ polyprenyl-PP) => ubiquinol	Pathway modules	Metabolism of cofactors and vitamins	Cofactor and vitamin metabolism	(K03181.K18240) K03179 (K03182+K03186) K18800 K00568 K03185 K03183 K03184 K00568	1	True	K18800.K03185.K03184.K00568.K03186.K03179.K03181.K03183.K03182
688070	Bin_Rhodococcus_rhodnii	M00573	Biotin biosynthesis. BioI pathway. long-chain-acyl-ACP => pimeloyl-ACP => biotin	Pathway modules	Metabolism of cofactors and vitamins	Cofactor and vitamin metabolism	K16593 K00652 K19563 K01935 K01012	0.6	False	K00652.K01012.K01935
688071	Bin_Rhodococcus_rhodnii	M00577	Biotin biosynthesis. BioW pathway. pimelate => pimeloyl-CoA => biotin	Pathway modules	Metabolism of cofactors and vitamins	Cofactor and vitamin metabolism	K01906 K00652 (K00833.K19563) K01935 K01012	0.8	True	K00652.K01012.K01935.K00833
688069	Bin_Rhodococcus_rhodnii	M00123	Biotin biosynthesis. pimeloyl-ACP/CoA => biotin	Pathway modules	Metabolism of cofactors and vitamins	Cofactor and vitamin metabolism	K00652 ((K00833.K19563) K01935.K19562) K01012	1	True	K00652.K01012.K01935.K00833
688083	Bin_Rhodococcus_rhodnii	M00141	C1-unit interconversion. eukaryotes	Pathway modules	Metabolism of cofactors and vitamins	Cofactor and vitamin metabolism	K00600 (K00288.(K13403 K13402))	0.5	False	K00600
688082	Bin_Rhodococcus_rhodnii	M00140	C1-unit interconversion. prokaryotes	Pathway modules	Metabolism of cofactors and vitamins	Cofactor and vitamin metabolism	K00600 (K01491.(K00300 K01500)) K01938	0.666667	False	K01491.K00600
688089	Bin_Rhodococcus_rhodnii	M00925	Cobalamin biosynthesis. aerobic. uroporphyrinogen III => precorrin 2 => cobyrinate a.c-diamide	Pathway modules	Metabolism of cofactors and vitamins	Cofactor and vitamin metabolism	(K02303.K13542) (K03394.K13540) K02229 (K05934.K13540.K13541) K05936 K02228 K05895 K00595 K06042 K02224 K02230+K09882+K09883	0.0909091	False	K02303.K13542
688088	Bin_Rhodococcus_rhodnii	M00924	Cobalamin biosynthesis. anaerobic. uroporphyrinogen III => sirohydrochlorin => cobyrinate a.c-diamide	Pathway modules	Metabolism of cofactors and vitamins	Cofactor and vitamin metabolism	(K02302.(K02303.K13542) K02304) (K02190.K03795.K22011) K03394 (K05934.K13541.K21479) K05936 (K02189.K13541) K02188 K05895 (K02191 K03399.K00595) K06042 K02224	0.181818	False	K03795.K02302.K02303.K13542
688090	Bin_Rhodococcus_rhodnii	M00122	Cobalamin biosynthesis. cobyrinate a.c-diamide => cobalamin	Pathway modules	Metabolism of cofactors and vitamins	Cofactor and vitamin metabolism	(K00798.K19221) K02232 (K02225.K02227) K02231 K00768 (K02226.K22316) K02233	0.714286	False	K02231.K02233.K00768.K22316.K00798
688067	Bin_Rhodococcus_rhodnii	M00914	Coenzyme A biosynthesis. archaea. 2-oxoisovalerate => 4-phosphopantoate => CoA	Pathway modules	Metabolism of cofactors and vitamins	Cofactor and vitamin metabolism	K00606 K00077 K06982 K09722 K13038 K02201 K09735	0.285714	False	K00606.K13038
688066	Bin_Rhodococcus_rhodnii	M00120	Coenzyme A biosynthesis. pantothenate => CoA	Pathway modules	Metabolism of cofactors and vitamins	Cofactor and vitamin metabolism	(K00867.K03525.K01947.K09680) ((K01922.K21977) K01598.K13038) (K02318.(K00954.K02201) K00859)	1	True	K00954.K00867.K00859.K13038.K03525
688085	Bin_Rhodococcus_rhodnii	M00868	Heme biosynthesis. animals and fungi. glycine => heme	Pathway modules	Metabolism of cofactors and vitamins	Cofactor and vitamin metabolism	K00643 K01698 K01749 K01719 K01599 K00228 K00231 K01772	0.75	True	K01719.K01772.K01599.K01749.K01698.K00231
688087	Bin_Rhodococcus_rhodnii	M00926	Heme biosynthesis. bacteria. glutamyl-tRNA => coproporphyrin III => heme	Pathway modules	Metabolism of cofactors and vitamins	Cofactor and vitamin metabolism	K02492 K01845 K01698 K01749 (K01719.K13542) K01599 K00231 K01772 K00435	1	True	K01719.K01772.K01599.K01749.K02492.K01698.K01845.K00435.K00231.K13542
688086	Bin_Rhodococcus_rhodnii	M00121	Heme biosynthesis. plants and bacteria. glutamate => heme	Pathway modules	Metabolism of cofactors and vitamins	Cofactor and vitamin metabolism	K01885 K02492 K01845 K01698 K01749 (K01719.K13542.K13543) K01599 (K00228.K02495) (K00230.K00231.K08973) K01772	1	True	K01885.K01719.K01772.K01599.K02495.K01749.K02492.K01698.K01845.K00231.K13542
688074	Bin_Rhodococcus_rhodnii	M00883	Lipoic acid biosynthesis. animals and bacteria. octanoyl-ACP => dihydrolipoyl-H => dihydrolipoyl-E2	Pathway modules	Metabolism of cofactors and vitamins	Cofactor and vitamin metabolism	(K23735.K23734) K03644 (K10105.K16869)	0.333333	False	K03644
688073	Bin_Rhodococcus_rhodnii	M00882	Lipoic acid biosynthesis. eukaryotes. octanoyl-ACP => dihydrolipoyl-H	Pathway modules	Metabolism of cofactors and vitamins	Cofactor and vitamin metabolism	K23735 K03644	0.5	False	K03644
688075	Bin_Rhodococcus_rhodnii	M00884	Lipoic acid biosynthesis. octanoyl-CoA => dihydrolipoyl-E2	Pathway modules	Metabolism of cofactors and vitamins	Cofactor and vitamin metabolism	K23750 K03644	0.5	False	K03644
688072	Bin_Rhodococcus_rhodnii	M00881	Lipoic acid biosynthesis. plants and bacteria. octanoyl-ACP => dihydrolipoyl-E2/H	Pathway modules	Metabolism of cofactors and vitamins	Cofactor and vitamin metabolism	K03801 K03644	1	True	K03644.K03801
688080	Bin_Rhodococcus_rhodnii	M00843	L-threo-Tetrahydrobiopterin biosynthesis. GTP => L-threo-BH4	Pathway modules	Metabolism of cofactors and vitamins	Cofactor and vitamin metabolism	K01495 K01737 K17745	0.333333	False	K01495
688092	Bin_Rhodococcus_rhodnii	M00116	Menaquinone biosynthesis. chorismate (+ polyprenyl-PP) => menaquinol	Pathway modules	Metabolism of cofactors and vitamins	Cofactor and vitamin metabolism	K02552 K02551 K08680 K02549 K01911 K01661 K19222 K02548 K03183	0.777778	True	K02551.K01661.K02549.K19222.K02548.K01911.K03183
688081	Bin_Rhodococcus_rhodnii	M00880	Molybdenum cofactor biosynthesis. GTP => molybdenum cofactor	Pathway modules	Metabolism of cofactors and vitamins	Cofactor and vitamin metabolism	((K03639 K03637).K20967) (K03635.K21142) (((K03831.K03638) K03750).K15376)	0.8	True	K03750.K03639.K03637.K03635
688061	Bin_Rhodococcus_rhodnii	M00115	NAD biosynthesis. aspartate => quinolinate => NAD	Pathway modules	Metabolism of cofactors and vitamins	Cofactor and vitamin metabolism	(K00278.K06989) K03517 K00767 (K00969.K06210) (K01916.K01950)	0.6	False	K06989.K01916.K00969
688062	Bin_Rhodococcus_rhodnii	M00912	NAD biosynthesis. tryptophan => quinolinate => NAD	Pathway modules	Metabolism of cofactors and vitamins	Cofactor and vitamin metabolism	(K00453.K00463) (K01432.K14263.K07130) K00486 K01556 K00452 K00767 (K00969.K06210) (K01916.K01950)	0.5	False	K00452.K01916.K00969.K00453
688063	Bin_Rhodococcus_rhodnii	M00622	Nicotinate degradation. nicotinate => fumarate	Pathway modules	Metabolism of cofactors and vitamins	Cofactor and vitamin metabolism	K18029+K18030 K14974 K18028 K15357 K13995 K01799	0.5	False	K01799.K13995.K18028
688065	Bin_Rhodococcus_rhodnii	M00913	Pantothenate biosynthesis. 2-oxoisovalerate/spermine => pantothenate	Pathway modules	Metabolism of cofactors and vitamins	Cofactor and vitamin metabolism	K00606 K00077 K13367 K00128 K01918	0.4	False	K00606.K01918
688064	Bin_Rhodococcus_rhodnii	M00119	Pantothenate biosynthesis. valine/L-aspartate => pantothenate	Pathway modules	Metabolism of cofactors and vitamins	Cofactor and vitamin metabolism	K00826 K00606 K00077 K01579 (K01918.K13799)	0.8	True	K00606.K00826.K01918.K01579
688093	Bin_Rhodococcus_rhodnii	M00932	Phylloquinone biosynthesis. chorismate (+ phytyl-PP) => phylloquinol	Pathway modules	Metabolism of cofactors and vitamins	Cofactor and vitamin metabolism	(K02552 K02551 K08680 K02549.K14759) (K01911.K14760) K01661 (K19222.K12073) K23094 K17872 K23095	0.5	False	K02551.K01661.K02549.K19222.K01911
688068	Bin_Rhodococcus_rhodnii	M00572	Pimeloyl-ACP biosynthesis. BioC-BioH pathway. malonyl-ACP => pimeloyl-ACP	Pathway modules	Metabolism of cofactors and vitamins	Cofactor and vitamin metabolism	K02169 (K00647.K09458) K00059 K02372 K00208 (K02170.K09789.K19560.K19561)	0.166667	False	K00059
688059	Bin_Rhodococcus_rhodnii	M00124	Pyridoxal-P biosynthesis. erythrose-4P => pyridoxal-P	Pathway modules	Metabolism of cofactors and vitamins	Cofactor and vitamin metabolism	K03472 K03473 K00831 K00097 K03474 K00275	0.333333	False	K00831.K00275
688060	Bin_Rhodococcus_rhodnii	M00916	Pyridoxal-P biosynthesis. R5P + glyceraldehyde-3P + glutamine => pyridoxal-P	Pathway modules	Metabolism of cofactors and vitamins	Cofactor and vitamin metabolism	K06215+K08681	1	True	K08681.K06215
688058	Bin_Rhodococcus_rhodnii	M00911	Riboflavin biosynthesis. fungi. GTP => riboflavin/FMN/FAD	Pathway modules	Metabolism of cofactors and vitamins	Cofactor and vitamin metabolism	K01497 K14654 K14655 -- K02858 K00794 K00793 K00861 K00953	0.444444	False	K02858.K00793.K00794.K01497
688057	Bin_Rhodococcus_rhodnii	M00125	Riboflavin biosynthesis. plants and bacteria. GTP => riboflavin/FMN/FAD	Pathway modules	Metabolism of cofactors and vitamins	Cofactor and vitamin metabolism	(K01497.K14652) (K01498 K00082.K11752) (K22912.K20860.K20861.K20862.K21063.K21064) (K02858.K14652) K00794 K00793 (K20884 K22949.K11753)	0.857143	True	K11753.K02858.K00793.K14652.K00794.K01497.K11752
688084	Bin_Rhodococcus_rhodnii	M00846	Siroheme biosynthesis. glutamyl-tRNA => siroheme	Pathway modules	Metabolism of cofactors and vitamins	Cofactor and vitamin metabolism	K02492 K01845 K01698 K01749 (K01719.K13542.K13543) (K02302.(K00589.K02303.K02496.K13542.K13543)+K02304-K03794)	1	True	K01719.K02302.K02303.K01749.K02492.K01698.K01845.K13542
688079	Bin_Rhodococcus_rhodnii	M00842	Tetrahydrobiopterin biosynthesis. GTP => BH4	Pathway modules	Metabolism of cofactors and vitamins	Cofactor and vitamin metabolism	K01495 K01737 K00072	0.333333	False	K01495
688076	Bin_Rhodococcus_rhodnii	M00126	Tetrahydrofolate biosynthesis. GTP => THF	Pathway modules	Metabolism of cofactors and vitamins	Cofactor and vitamin metabolism	(K01495.K09007.K22391) (K01077.K01113.(K08310.K19965)) ((K13939.(K13940.K01633 K00950) K00796).(K01633 K13941)) (K11754.K20457) (K00287.K13998)	1	True	K01113.K00796.K00950.K01495.K01633.K11754.K00287
688078	Bin_Rhodococcus_rhodnii	M00841	Tetrahydrofolate biosynthesis. mediated by PTPS. GTP => THF	Pathway modules	Metabolism of cofactors and vitamins	Cofactor and vitamin metabolism	K01495 K22101 K13941 K11754 K13998	0.4	False	K01495.K11754
688077	Bin_Rhodococcus_rhodnii	M00840	Tetrahydrofolate biosynthesis. mediated by ribA and trpF. GTP => THF	Pathway modules	Metabolism of cofactors and vitamins	Cofactor and vitamin metabolism	K14652 K22100 -- K01633 K13941 K22099 K00287	0.428571	False	K14652.K01633.K00287
688054	Bin_Rhodococcus_rhodnii	M00896	Thiamine biosynthesis. archaea. AIR (+ NAD+) => TMP/TPP	Pathway modules	Metabolism of cofactors and vitamins	Cofactor and vitamin metabolism	K22699 K03147 (K00941 (K00788.K21220).K21219) K00946	0.8	True	K00941.K00788.K00946.K03147
688055	Bin_Rhodococcus_rhodnii	M00897	Thiamine biosynthesis. plants. AIR (+ NAD+) => TMP/thiamine/TPP	Pathway modules	Metabolism of cofactors and vitamins	Cofactor and vitamin metabolism	K03146 K03147 K14153 K22911 K00949	0.2	False	K03147
688053	Bin_Rhodococcus_rhodnii	M00895	Thiamine biosynthesis. prokaryotes. AIR (+ DXP/glycine) => TMP/TPP	Pathway modules	Metabolism of cofactors and vitamins	Cofactor and vitamin metabolism	K03148+K03154 K03151 K03153 K03149 K10810 K03147 K00941 K00788 K00946	0.833333	True	K03149.K00941.K00788.K03153.K03154.K00946.K03151.K03147
688052	Bin_Rhodococcus_rhodnii	M00127	Thiamine biosynthesis. prokaryotes. AIR (+ DXP/tyrosine) => TMP/TPP	Pathway modules	Metabolism of cofactors and vitamins	Cofactor and vitamin metabolism	K03148+K03154 K03151 K03150 K03149 K03147 ((K00941 K00788).K14153.K21219) K00946	0.8125	True	K03149.K00941.K00788.K03154.K00946.K03151.K03147
688056	Bin_Rhodococcus_rhodnii	M00899	Thiamine salvage pathway. HMP/HET => TMP	Pathway modules	Metabolism of cofactors and vitamins	Cofactor and vitamin metabolism	K00878 ((K00941 K00788).K14153.K21219)	0.666667	False	K00941.K00788
688091	Bin_Rhodococcus_rhodnii	M00117	Ubiquinone biosynthesis. prokaryotes. chorismate (+ polyprenyl-PP) => ubiquinol	Pathway modules	Metabolism of cofactors and vitamins	Cofactor and vitamin metabolism	(K03181.K18240) K03179 (K03182+K03186) K18800 K00568 K03185 K03183 K03184 K00568	0.166667	False	K03186.K03183

## Sheet: Metabolic capacity
unique_id	bin_name	kegg_module	module_name	module_class	module_category	module_subcategory	module_definition	module_completeness	module_is_complete	kofam_hits_in_module
468532	Bin_Enterococcus_faecalis	M00611	Oxygenic photosynthesis in plants and cyanobacteria	Signature modules	Module set	Metabolic capacity	(M00161.M00163) M00165	0.227273	False	K00134.K00927.K04041.K00615.K01807
468536	Bin_Enterococcus_faecalis	M00618	Acetogen	Signature modules	Module set	Metabolic capacity	M00377 M00579	0.642857	False	K00625.K01491.K00925.K15024.K01938
468535	Bin_Enterococcus_faecalis	M00617	Methanogen	Signature modules	Module set	Metabolic capacity	M00567.M00357.M00356.M00563	0.333333	False	K00625.K00925
468533	Bin_Enterococcus_faecalis	M00612	Anoxygenic photosynthesis in purple bacteria	Signature modules	Module set	Metabolic capacity	M00597 M00165	0.227273	False	K00134.K00927.K04041.K00615.K01807
468534	Bin_Enterococcus_faecalis	M00614	Anoxygenic photosynthesis in green sulfur bacteria	Signature modules	Module set	Metabolic capacity	M00598 M00173	0.1	False	K03737.K01958
573139	Bin_Kocuria	M00616	Sulfate-sulfur assimilation	Signature modules	Module set	Metabolic capacity	(K02048.K23163)+K02046+K02047+K02045 M00176	0.277778	False	K00390.K00956.K00957
573138	Bin_Kocuria	M00615	Nitrate assimilation	Signature modules	Module set	Metabolic capacity	(K02575.K15576+K15577+K15578-K15579) M00531	0.5	False	K02575
573132	Bin_Kocuria	M00611	Oxygenic photosynthesis in plants and cyanobacteria	Signature modules	Module set	Metabolic capacity	(M00161.M00163) M00165	0.227273	False	K01808.K00134.K01624.K00927
573137	Bin_Kocuria	M00618	Acetogen	Signature modules	Module set	Metabolic capacity	M00377 M00579	0.642857	False	K00297.K01491.K13788.K00925
573136	Bin_Kocuria	M00617	Methanogen	Signature modules	Module set	Metabolic capacity	M00567.M00357.M00356.M00563	0.2	False	K01895.K13788.K00925
573133	Bin_Kocuria	M00612	Anoxygenic photosynthesis in purple bacteria	Signature modules	Module set	Metabolic capacity	M00597 M00165	0.227273	False	K01808.K00134.K01624.K00927
573134	Bin_Kocuria	M00613	Anoxygenic photosynthesis in green nonsulfur bacteria	Signature modules	Module set	Metabolic capacity	M00597 M00376	0.0769231	False	K00240.K00241.K00239.K00242.K01679.K01966
573135	Bin_Kocuria	M00614	Anoxygenic photosynthesis in green sulfur bacteria	Signature modules	Module set	Metabolic capacity	M00598 M00173	0.3	False	K00240.K00241.K00239.K00024.K01902.K01903.K01681.K00242.K01958.K01679
816615	Bin_Pectobacterium	M00616	Sulfate-sulfur assimilation	Signature modules	Module set	Metabolic capacity	(K02048.K23163)+K02046+K02047+K02045 M00176	0.875	True	K00860.K02045.K02047.K02046.K00380.K00381.K00390.K00956.K00957
816614	Bin_Pectobacterium	M00615	Nitrate assimilation	Signature modules	Module set	Metabolic capacity	(K02575.K15576+K15577+K15578-K15579) M00531	0.5	False	K02575
816608	Bin_Pectobacterium	M00611	Oxygenic photosynthesis in plants and cyanobacteria	Signature modules	Module set	Metabolic capacity	(M00161.M00163) M00165	0.363636	False	K00134.K01807.K00615.K00855.K01624.K00927
816613	Bin_Pectobacterium	M00618	Acetogen	Signature modules	Module set	Metabolic capacity	M00377 M00579	0.642857	False	K13788.K00925.K00297.K01491
816612	Bin_Pectobacterium	M00617	Methanogen	Signature modules	Module set	Metabolic capacity	M00567.M00357.M00356.M00563	0.2	False	K13788.K01895.K00925
816609	Bin_Pectobacterium	M00612	Anoxygenic photosynthesis in purple bacteria	Signature modules	Module set	Metabolic capacity	M00597 M00165	0.363636	False	K00134.K01807.K00615.K00855.K01624.K00927
816610	Bin_Pectobacterium	M00613	Anoxygenic photosynthesis in green nonsulfur bacteria	Signature modules	Module set	Metabolic capacity	M00597 M00376	0.0961538	False	K00242.K00240.K00241.K01679.K00239.K01962.K01963
816611	Bin_Pectobacterium	M00614	Anoxygenic photosynthesis in green sulfur bacteria	Signature modules	Module set	Metabolic capacity	M00598 M00173	0.363636	False	K01595.K00031.K01681.K00242.K00240.K00241.K01902.K01679.K01903.K03737.K00239.K01007.K01682
688129	Bin_Rhodococcus_rhodnii	M00616	Sulfate-sulfur assimilation	Signature modules	Module set	Metabolic capacity	(K02048.K23163)+K02046+K02047+K02045 M00176	0.819444	True	K02045.K02047.K02046.K00390.K00392.K00956.K00957
688128	Bin_Rhodococcus_rhodnii	M00615	Nitrate assimilation	Signature modules	Module set	Metabolic capacity	(K02575.K15576+K15577+K15578-K15579) M00531	0.5	False	K02575
688122	Bin_Rhodococcus_rhodnii	M00611	Oxygenic photosynthesis in plants and cyanobacteria	Signature modules	Module set	Metabolic capacity	(M00161.M00163) M00165	0.363636	False	K01808.K00134.K02446.K00615.K00927.K01624
688127	Bin_Rhodococcus_rhodnii	M00618	Acetogen	Signature modules	Module set	Metabolic capacity	M00377 M00579	0.392857	False	K13788.K00297.K01491
688126	Bin_Rhodococcus_rhodnii	M00617	Methanogen	Signature modules	Module set	Metabolic capacity	M00567.M00357.M00356.M00563	0.3	False	K13788.K01895.K00320
688123	Bin_Rhodococcus_rhodnii	M00612	Anoxygenic photosynthesis in purple bacteria	Signature modules	Module set	Metabolic capacity	M00597 M00165	0.363636	False	K01808.K00134.K02446.K00615.K00927.K01624
688124	Bin_Rhodococcus_rhodnii	M00613	Anoxygenic photosynthesis in green nonsulfur bacteria	Signature modules	Module set	Metabolic capacity	M00597 M00376	0.115385	False	K14470.K00242.K00240.K00241.K01676.K00239.K01679.K01965.K01966
688125	Bin_Rhodococcus_rhodnii	M00614	Anoxygenic photosynthesis in green sulfur bacteria	Signature modules	Module set	Metabolic capacity	M00598 M00173	0.35	False	K00242.K00240.K00241.K00024.K01676.K00031.K01902.K01903.K00239.K01958.K01679.K01681.K01595

## Sheet: Drug resistance & pathogenicity
unique_id	bin_name	kegg_module	module_name	module_class	module_category	module_subcategory	module_definition	module_completeness	module_is_complete	kofam_hits_in_module
468530	Bin_Enterococcus_faecalis	M00627	beta-Lactam resistance. Bla system	Signature modules	Gene set	Drug resistance	K02172 K02171 (K18766.K17836)	0.666667	False	K02171.K17836
468531	Bin_Enterococcus_faecalis	M00725	Cationic antimicrobial peptide (CAMP) resistance. dltABCD operon	Signature modules	Gene set	Drug resistance	K19077 K19078 K03367+K03739+K14188+K03740	0.333333	False	K03367.K03739.K03740.K14188
573130	Bin_Kocuria	M00651	Vancomycin resistance. D-Ala-D-Lac type	Signature modules	Gene set	Drug resistance	(K18345 K18344 K07260 K18346).(K18351 K18352 K18354 K18353) (K18347 K15739 K08641)	0.285714	False	K07260.K18346
573131	Bin_Kocuria	M00714	Multidrug resistance. efflux pump QacA	Signature modules	Gene set	Drug resistance	K18938 K08167	0.5	False	K08167
816600	Bin_Pectobacterium	M00651	Vancomycin resistance. D-Ala-D-Lac type	Signature modules	Gene set	Drug resistance	(K18345 K18344 K07260 K18346).(K18351 K18352 K18354 K18353) (K18347 K15739 K08641)	0.285714	False	K07260.K08641
816601	Bin_Pectobacterium	M00744	Cationic antimicrobial peptide (CAMP) resistance. protease PgtE	Signature modules	Gene set	Drug resistance	K07637 K07660 K08477	0.666667	False	K07660.K07637
816604	Bin_Pectobacterium	M00697	Multidrug resistance. efflux pump MdtEF-TolC	Signature modules	Gene set	Drug resistance	K07690 K18898+K18899+K12340	0.166667	False	K12340
816606	Bin_Pectobacterium	M00746	Multidrug resistance. repression of porin OmpF	Signature modules	Gene set	Drug resistance	K13632 K18513 K09476	0.333333	False	K09476
816602	Bin_Pectobacterium	M00718	Multidrug resistance. efflux pump MexAB-OprM	Signature modules	Gene set	Drug resistance	K18131 K03585+K18138+K18139	0.333333	False	K18138.K03585
816603	Bin_Pectobacterium	M00696	Multidrug resistance. efflux pump AcrEF-TolC	Signature modules	Gene set	Drug resistance	K18140 K18141+K18142+K12340	0.166667	False	K12340
816605	Bin_Pectobacterium	M00698	Multidrug resistance. efflux pump BpeEF-OprC	Signature modules	Gene set	Drug resistance	K18900 K18901+K18902+K18903	0.5	False	K18900
816598	Bin_Pectobacterium	M00542	EHEC/EPEC pathogenicity signature. T3SS and effectors	Signature modules	Gene set	Pathogenicity	K03221+K03219+K03222+K03226+K03227+K03228+K03229+K03230+K03224+K03225 K12784 K12787 K12785 K12786 K12788 K16041 K16042	0.1125	False	K03221.K03230.K03225.K03219.K03222.K03228.K03229.K03227.K03226
816599	Bin_Pectobacterium	M00575	Pertussis pathogenicity signature. T1SS	Signature modules	Gene set	Pathogenicity	K22944 K11004 K07389 K11003 K12340	0.2	False	K12340
816607	Bin_Pectobacterium	M00660	Xanthomonas spp. pathogenicity signature. T3SS and effectors	Signature modules	Gene set	Plant pathogenicity	K03222+K03226+K03227+K03228+K03229+K03230+K03224+K03225+K03223+K18374+K18376 K18373 K18375 K18377 K18378 K18379 K18380 K18381	0.0795455	False	K03230.K03225.K03222.K03228.K03229.K03227.K03226
688119	Bin_Rhodococcus_rhodnii	M00651	Vancomycin resistance. D-Ala-D-Lac type	Signature modules	Gene set	Drug resistance	(K18345 K18344 K07260 K18346).(K18351 K18352 K18354 K18353) (K18347 K15739 K08641)	0.142857	False	K18346.K18353
688118	Bin_Rhodococcus_rhodnii	M00627	beta-Lactam resistance. Bla system	Signature modules	Gene set	Drug resistance	K02172 K02171 (K18766.K17836)	0.333333	False	K02171
688121	Bin_Rhodococcus_rhodnii	M00714	Multidrug resistance. efflux pump QacA	Signature modules	Gene set	Drug resistance	K18938 K08167	0.5	False	K08167
688120	Bin_Rhodococcus_rhodnii	M00726	Cationic antimicrobial peptide (CAMP) resistance. lysyl-phosphatidylglycerol (L-PG) synthase MprF	Signature modules	Gene set	Drug resistance	K19077 K19078 K14205	0.333333	False	K14205
688117	Bin_Rhodococcus_rhodnii	M00860	Bacillus anthracis pathogenicity signature. polyglutamic acid capsule biosynthesis	Signature modules	Gene set	Pathogenicity	K22976 K22977 K22980 K07282 K22116 K01932 K22981	0.285714	False	K01932.K22116

## Sheet: Xenobiotics biodegradation
unique_id	bin_name	kegg_module	module_name	module_class	module_category	module_subcategory	module_definition	module_completeness	module_is_complete	kofam_hits_in_module
468529	Bin_Enterococcus_faecalis	M00569	Catechol meta-cleavage. catechol => acetyl-CoA / 4-methylcatechol => propanoyl-CoA	Pathway modules	Xenobiotics biodegradation	Aromatics degradation	(K00446.K07104) ((K10217 K01821 K01617).K10216) (K18364.K02554) (K18365.K01666) (K18366.K04073)	0.285714	False	K07104.K01821
573125	Bin_Kocuria	M00551	Benzoate degradation. benzoate => catechol / methylbenzoate => methylcatechol	Pathway modules	Xenobiotics biodegradation	Aromatics degradation	K05549+K05550+K05784 K05783	1	True	K05549.K05783.K05784.K05550
573127	Bin_Kocuria	M00569	Catechol meta-cleavage. catechol => acetyl-CoA / 4-methylcatechol => propanoyl-CoA	Pathway modules	Xenobiotics biodegradation	Aromatics degradation	(K00446.K07104) ((K10217 K01821 K01617).K10216) (K18364.K02554) (K18365.K01666) (K18366.K04073)	0.2	False	K00446
573126	Bin_Kocuria	M00568	Catechol ortho-cleavage. catechol => 3-oxoadipate	Pathway modules	Xenobiotics biodegradation	Aromatics degradation	K03381 K01856 K03464 (K01055.K14727)	0.75	True	K03381.K01055.K03464
573128	Bin_Kocuria	M00878	Phenylacetate degradation. phenylaxetate => acetyl-CoA/succinyl-CoA	Pathway modules	Xenobiotics biodegradation	Aromatics degradation	K01912 K02609+K02610+K02611+K02612+K02613 K15866 K02618 K02615 K01692 K00074	0.571429	False	K02609.K01692.K02612.K02613.K02611.K02610.K01912.K02618
573123	Bin_Kocuria	M00538	Toluene degradation. toluene => benzoate	Pathway modules	Xenobiotics biodegradation	Aromatics degradation	K15760+K15761-K15762+K15763+K15764-K15765 K00055 K00141	0.666667	False	K00055.K00141
573129	Bin_Kocuria	M00545	Trans-cinnamate degradation. trans-cinnamate => acetyl-CoA	Pathway modules	Xenobiotics biodegradation	Aromatics degradation	(((K05708+K05709+K05710+K00529) K05711).K05712) K05713 K05714 K02554 K01666 K04073	0.166667	False	K05712.K00529
573124	Bin_Kocuria	M00537	Xylene degradation. xylene => methylbenzoate	Pathway modules	Xenobiotics biodegradation	Aromatics degradation	K15757+K15758 K00055 K00141	0.666667	False	K00055.K00141
816597	Bin_Pectobacterium	M00569	Catechol meta-cleavage. catechol => acetyl-CoA / 4-methylcatechol => propanoyl-CoA	Pathway modules	Xenobiotics biodegradation	Aromatics degradation	(K00446.K07104) ((K10217 K01821 K01617).K10216) (K18364.K02554) (K18365.K01666) (K18366.K04073)	0.142857	False	K01821
688113	Bin_Rhodococcus_rhodnii	M00569	Catechol meta-cleavage. catechol => acetyl-CoA / 4-methylcatechol => propanoyl-CoA	Pathway modules	Xenobiotics biodegradation	Aromatics degradation	(K00446.K07104) ((K10217 K01821 K01617).K10216) (K18364.K02554) (K18365.K01666) (K18366.K04073)	1	True	K00446.K01821.K01617.K02554.K01666.K04073.K10217
688112	Bin_Rhodococcus_rhodnii	M00568	Catechol ortho-cleavage. catechol => 3-oxoadipate	Pathway modules	Xenobiotics biodegradation	Aromatics degradation	K03381 K01856 K03464 (K01055.K14727)	0.25	False	K14727.K01055
688114	Bin_Rhodococcus_rhodnii	M00539	Cumate degradation. p-cumate => 2-oxopent-4-enoate + 2-methylpropanoate	Pathway modules	Xenobiotics biodegradation	Aromatics degradation	K10619+K16303+K16304+K18227 K10620 K10621 K10622 K10623	0.2	False	K10621
688115	Bin_Rhodococcus_rhodnii	M00878	Phenylacetate degradation. phenylaxetate => acetyl-CoA/succinyl-CoA	Pathway modules	Xenobiotics biodegradation	Aromatics degradation	K01912 K02609+K02610+K02611+K02612+K02613 K15866 K02618 K02615 K01692 K00074	0.857143	True	K00074.K02609.K02618.K01692.K02612.K02613.K02611.K02610.K01912.K15866
688116	Bin_Rhodococcus_rhodnii	M00545	Trans-cinnamate degradation. trans-cinnamate => acetyl-CoA	Pathway modules	Xenobiotics biodegradation	Aromatics degradation	(((K05708+K05709+K05710+K00529) K05711).K05712) K05713 K05714 K02554 K01666 K04073	0.833333	True	K05710.K00529.K05713.K02554.K01666.K04073.K05708.K05712
